# Supplementary material for: Transmembrane CLIC1 sustains EGFRvIII–STAT3 oncogenic signaling in Glioblastoma through interaction with OSMR
Source: Research Square preprint supplement (doi:10.21203/rs.3.rs-6537096/v1), 2025-05-05
Supplement: Supplementary file 1 [file 3da21d0f2fcc73bf582d783a.docx]

**Supplementary Information**

**Transmembrane CLIC1 sustains EGFRvIII–STAT3 oncogenic signaling in Glioblastoma through interaction with OSMR**

Amir Hossein Mansourabadi1,2,3,*, Kamaldeep Randhawa1,2,3,*, Jamie Snider4,*, Dianbo Qu1,2,3, Francesca Cianci5 Max Kotlyar6, Guido Rey5, Laura Raco1,2,3,7, Dylan Burger1,8, Janusz Rak9, Vahab D. Soleimani10, Igor Jurisica6,11,12, Michele Mazzanti5, Igor Stagljar4,13,14,15,¶, Arezu Jahani-Asl1,2,3,7,16,17, ¶

1Department of Cellular and Molecular Medicine, Faculty of Medicine, University of Ottawa, 451 Smyth Road, K1H 8M5, Ottawa, Canada

2University of Ottawa Brain and Mind Research Institute, 451 Smyth Road, K1H 8M5, Ottawa, Canada

3Ottawa Institute of Systems Biology, 451 Smyth Road K1H 8M5, Ottawa, Canada

4Donnelly Centre, University of Toronto, Ontario, Canada

5Laboratory of Cellular and Molecular Physiology, Department of Biosciences, University of Milano, Via Celoria 26, I-20133, Milano, Italy

6Osteoarthritis Research Program, Division of Orthopedic Surgery, Schroeder Arthritis Institute, and Data Science Discovery Centre for Chronic Diseases, Krembil Research Institute, University Health Network, 60 Leonard Avenue, 5KD-407, Toronto, Ontario, Canada M5T 0S8

7Division of Clinical and Translational Research, McGill University, 1001 Decarie Boulevard

Montreal (Quebec) H4A 3J1

8Inflammation & Chronic Disease, Ottawa Hospital Research Institute, Ottawa, ON, K1H 8L6, Canada.

9Department of Pediatrics, Faculty of Medicine and Health Sciences, McGill University

10Department of Biochemistry, Microbiology and Immunology, Faculty of Medicine, University of Ottawa, 451 Smyth Road K1H 8M5, Ottawa, Canada

11Departments of Medical Biophysics and Computer Science, and Faculty of Dentistry, University of Toronto

12Institute of Neuroimmunology, Slovak Academy of Sciences, Bratislava, Slovakia

13Mediterranean Institute for Life Sciences, Meštrovićevo Šetalište 45, HR-21000 Split, Croatia

14Department of Biochemistry, University of Toronto, Ontario, Canada

15Department of Molecular Genetics, University of Toronto, Ontario, Canada

16Regenerative Medicine Program and Cancer Therapeutics Program, Ottawa Hospital Research Institute, Ottawa, ON, K1H 8L6, Canada.

17Gerald Bronfman Department of Oncology, McGill University, 5100 de Maisonneuve Blvd. West, Montréal, QC, H4A 3T2, Canada.

*Authors contributed equally

¶Correspondence: igor.stagljar@utoronto.ca, arezu.jahani@uottawa.ca

**Supplementary Information:**

**1. Supplementary Tables 1 to 5**

**- Supplementary Table. 1 | Related to Fig. 2a-e**

**- Supplementary Table. 2 | Related to Fig. 2f-i**

**- Supplementary Table. 3 | Related to Fig. 2a-e**

**- Supplementary Table. 4**

**- Supplementary Table. 5**

**2. Supplementary Figures 1 to 8**

**- Supplementary Fig. 1. | Related to Fig. 2f-i**

**- Supplementary Fig. 2**

**- Supplementary Fig. 3**

**- Supplementary Fig. 4**

**- Supplementary Fig. 5 | Related to Fig. 6a-c**

**- Supplementary Fig. 6 | Related to Fig. 6h-m**

**- Supplementary Fig. 7 | Related to Fig. 1**

**3. Supplementary Methods**

**4. References**

**Supplementary Table. 1 | Related to Fig. 2a-e, Common candidate binding partners to OSMR-unique and OSMR/EGFRvIII-unique**.High confidence binding partners to OSMR regardless of cell’s genetic background was extracted for follow up analysis. The cellular localization of the common candidates is illustrated in the last column.

| **#** | **Common candidate binding partners** | **Detected by MaMTH** | **Novel MaMTH PPI** | **localization** |
| --- | --- | --- | --- | --- |
| 1 | AGO3 | high conf | y |  |
| 2 | BCAP31 | high conf | y | plasma membrane |
| 3 | BCL2L14 | high conf | y | cytoplasm |
| 4 | C8orf44 | high conf | y | nucleus |
| 5 | CLEC2B | high conf | y | plasma membrane |
| 6 | CLIC1 | high conf | y | plasma membrane |
| 7 | CREB3 | high conf | y | Golgi apparatus |
| 8 | CSGALNACT2 | high conf | y | Golgi apparatus |
| 9 | CXorf1 | high conf | y |  |
| 10 | DCN | high conf | y | Golgi apparatus |
| 11 | GC | high conf | y | cytoplasm |
| 12 | GLRX | high conf | y | nucleus |
| 13 | GPBP1 | high conf | y | plasma membrane |
| 14 | H3C1 | high conf | y | nucleus |
| 15 | IMMP2L | high conf | y | mitochondrion |
| 16 | LRRIQ1 | high conf | y |  |
| 17 | MAP4 | high conf | y | plasma membrane |
| 18 | NAT8 | high conf | y | endoplasmic reticulum |
| 19 | NRM | high conf | y | nucleus |
| 20 | PIGK | high conf | y | endoplasmic reticulum |
| 21 | PSORS1C1 | high conf | y |  |
| 22 | PTDSS1 | high conf | y | endoplasmic reticulum |
| 23 | RAB1B | high conf | y | Golgi apparatus |
| 24 | SETD7 | high conf | y | nucleus |
| 25 | SLC35B3 | high conf | y | Golgi apparatus |
| 26 | SMIM21 | high conf | y | plasma membrane |
| 27 | ST3GAL4 | high conf | y | Golgi apparatus |
| 28 | TANK | high conf | y | cytoplasm |
| 29 | TMPRSS6 | high conf | y | plasma membrane |
| 30 | ZP1 | high conf | y | plasma membrane |

**Supplementary Table. 2 | Related to Fig. 2f-i. Patient derived BTSCs and their genetic signature**.Four different patients derived BTSCs were employed in this study. The gender and age of the glioblastoma patients and their characterization for key genetic mutations are shown. M, male; wt, wild type; mut, mutant; vIII, EGFR variant III; homo del, homozygous deletion; NA – not available.

| Cell line | Sex | Age | *EGFR* | *TP53* | *PTEN* | *IDH1* | *NF1* | CDK2A |
| --- | --- | --- | --- | --- | --- | --- | --- | --- |
| BTSC12 | M | 59Y | wt | mut | mut | wt | NA | NA |
| BTSC30 | M | 67Y | wt | wt | mut | wt | NA | NA |
| BTSC73 | M | 52Y | vIII | mut | mut | wt | NA | homo del |
| BTSC147 | M | 55Y | vIII | mut | mut | wt | wt | homo del |

**Supplementary Table. 3 | Related to Fig. 2a-e. Screening of common high confidence binding proteins for their impact on cell viability using an siRNA knockdown approach.** A pool of siRNA was designed to knockdown the genes encoding common high confidence binding proteins of OSMR. The sequences of sense siRNA and antisense siRNA for each target gene are provided.

| **Target Gene Name** | **Sense siRNA Sequence** | **Antisense siRNA Sequence** |
| --- | --- | --- |
| B-cell receptor-associated protein 31 | UGGUGACUCUCAUUUCGCAtt | UGCGAAAUGAGAGUCACCAgg |
| B-cell receptor-associated protein 31 | GCAAGUUGGAUGUCGGGAAtt | UUCCCGACAUCCAACUUGCct |
| B-cell receptor-associated protein 31 | GCACUAAGCAAAAACUAGAtt | UCUAGUUUUUGCUUAGUGCtg |
| BCL2-like 14 (apoptosis facilitator) | CCGAGUAGCUGAAAUUGUUtt | AACAAUUUCAGCUACUCGGtt |
| BCL2-like 14 (apoptosis facilitator) | CCAUAGAAUUCAAAAUCCUtt | AGGAUUUUGAAUUCUAUGGtg |
| BCL2-like 14 (apoptosis facilitator) | AAGAGAUUUUUGUAACUGAtt | UCAGUUACAAAAAUCUCUUtg |
| small integral membrane protein 21 | GCAUAUUUCGAAACUUUCUtt | AGAAAGUUUCGAAAUAUGCtg |
| small integral membrane protein 21 | GCUGGGAACAUUUAAACAAtt | UUGUUUAAAUGUUCCCAGCtg |
| small integral membrane protein 21 | CACCAUAUUCGUUUCUUCAtt | UGAAGAAACGAAUAUGGUGtt |
| chromosome 8 open reading frame 44 | CAGAUGUACCGAGUUUGAAtt | UUCAAACUCGGUACAUCUGgt |
| chromosome 8 open reading frame 44 | CCGAGUUUGAAAUCCCAGAtt | UCUGGGAUUUCAAACUCGGta |
| chromosome 8 open reading frame 44 | GUAUUAGAAUUAUUUCUGAtt | UCAGAAAUAAUUCUAAUACct |
| C-type lectin domain family 2, member B | GAAUUUUCUUAGGCGGUAUtt | AUACCGCCUAAGAAAAUUCat |
| C-type lectin domain family 2, member B | AUACAACUGUUCCACUCAAtt | UUGAGUGGAACAGUUGUAUtt |
| C-type lectin domain family 2, member B | CAGCAACAGCUAGAUGUUAtt | UAACAUCUAGCUGUUGCUGca |
| chloride intracellular channel 1 | GGUUUUAGACAAUUACUUAtt | UAAGUAAUUGUCUAAAACCtt |
| chloride intracellular channel 1 | CAGCUGGGCUGGACAUAUUtt | AAUAUGUCCAGCCCAGCUGtg |
| chloride intracellular channel 1 | GUUUUAGACAAUUACUUAAtt | UUAAGUAAUUGUCUAAAACct |
| cAMP responsive element binding protein 3 | CUGUCUCUAUGGAUCUAGAtt | UCUAGAUCCAUAGAGACAGtt |
| cAMP responsive element binding protein 3 | GGCUAGUACUGACAGAUGAtt | UCAUCUGUCAGUACUAGCCta |
| cAMP responsive element binding protein 3 | GAGUGAGAGCUGUAGAAAAtt | UUUUCUACAGCUCUCACUCtc |
| chondroitin sulfate N-acetylgalactosaminyltransferase 2 | GGUCAUUAAUAAUCCUGAUtt | AUCAGGAUUAUUAAUGACCtc |
| chondroitin sulfate N-acetylgalactosaminyltransferase 2 | CUAGUGAUCUUUUAGAGUUtt | AACUCUAAAAGAUCACUAGgt |
| chondroitin sulfate N-acetylgalactosaminyltransferase 2 | GGACCUCUCAUGAAAGUGAtt | UCACUUUCAUGAGAGGUCCaa |
| SLIT and NTRK-like family, member 2 | CCAGUAGCCUAUUACCGAAtt | UUCGGUAAUAGGCUACUGGgt |
| SLIT and NTRK-like family, member 2 | GGAACCGUCUUGUCAAUGAtt | UCAUUGACAAGACGGUUCCat |
| SLIT and NTRK-like family, member 2 | GACUGUAUCCAAACGAAUUtt | AAUUCGUUUGGAUACAGUCtt |
| decorin | GCUGGACCGUUUCAACAGAtt | UCUGUUGAAACGGUCCAGCcc |
| decorin | AGAGGCUUAUUUGACUUUAtt | UAAAGUCAAAUAAGCCUCUct |
| decorin | GCUAGAUACUGGAAACCUAtt | UAGGUUUCCAGUAUCUAGCtt |
| eukaryotic translation initiation factor 2C, 3 | GAAGAGACAUCACACUCGAtt | UCGAGUGUGAUGUCUCUUCtg |
| eukaryotic translation initiation factor 2C, 3 | CAGUCGUCCUUCACACUAUtt | AUAGUGUGAAGGACGACUGgt |
| eukaryotic translation initiation factor 2C, 3 | CCAUAUGAGUUCGAUUUUUtt | AAAAAUCGAACUCAUAUGGgt |
| group-specific component (vitamin D binding protein) | GCUUAAACAUUUAUCACUUtt | AAGUGAUAAAUGUUUAAGCtg |
| group-specific component (vitamin D binding protein) | CUACCUGUUUUAAUGCUAAtt | UUAGCAUUAAAACAGGUAGtt |
| group-specific component (vitamin D binding protein) | GAUCCAAAGGAAUAUGCUAtt | UAGCAUAUUCCUUUGGAUCtt |
| glutaredoxin (thioltransferase) | CAACCACACUAACGAGAUUtt | AAUCUCGUUAGUGUGGUUGgt |
| glutaredoxin (thioltransferase) | GCAGUGAUCUAGUCUCUUUtt | AAAGAGACUAGAUCACUGCat |
| glutaredoxin (thioltransferase) | GAGUCUUUAUUGGUAAAGAtt | UCUUUACCAAUAAAGACUCga |
| GC-rich promoter binding protein 1 | GCAUGGACAGAGAAUCGUUtt | AACGAUUCUCUGUCCAUGCaa |
| GC-rich promoter binding protein 1 | GGAAGUUCCCGUUCUCGUAtt | UACGAGAACGGGAACUUCCac |
| GC-rich promoter binding protein 1 | GAAAGGGAUAUAAACCGAAtt | UUCGGUUUAUAUCCCUUUCtt |
| histone cluster 1, H3a | CUGAACUGCUUAUUCGUAAtt | UUACGAAUAAGCAGUUCAGtg |
| histone cluster 1, H3a | GUAGGGCUAUUUGAGGACAtt | UGUCCUCAAAUAGCCCUACca |
| histone cluster 1, H3a | GCAAACAGUUGGCCACUAAtt | UUAGUGGCCAACUGUUUGCgt |
| IMP2 inner mitochondrial membrane peptidase-like (S. cerevisiae) | GUGGUGACAUUGUAUCAUUtt | AAUGAUACAAUGUCACCACgg |
| IMP2 inner mitochondrial membrane peptidase-like (S. cerevisiae) | GGGUUGAAGGUGAUCAUCAtt | UGAUGAUCACCUUCAACCCag |
| IMP2 inner mitochondrial membrane peptidase-like (S. cerevisiae) | AGAGAGUGAUUGCUCUUGAtt | UCAAGAGCAAUCACUCUCUta |
| leucine-rich repeats and IQ motif containing 1 | GGUCUUUGUGAUACACCUAtt | UAGGUGUAUCACAAAGACCtt |
| leucine-rich repeats and IQ motif containing 1 | CAGCUUGACUAAAAUCGUAtt | UACGAUUUUAGUCAAGCUGtt |
| leucine-rich repeats and IQ motif containing 1 | CUACCAUUGUAUACCUAGAtt | UCUAGGUAUACAAUGGUAGgt |
| N-acetyltransferase 8 (GCN5-related, putative) | CAGUCUUUUUGAUUCCCAUtt | AUGGGAAUCAAAAAGACUGaa |
| N-acetyltransferase 8 (GCN5-related, putative) | GCUUAUUGUCCAUUCACAUtt | AUGUGAAUGGACAAUAAGCtt |
| N-acetyltransferase 8 (GCN5-related, putative) | CAACCUUUCACUGCAAUGAtt | UCAUUGCAGUGAAAGGUUGgg |
| nurim (nuclear envelope membrane protein) | CCUUCUCGUCUUUGACUAUtt | AUAGUCAAAGACGAGAAGGat |
| nurim (nuclear envelope membrane protein) | CGGGCCCAGCUACAAAGAAtt | UUCUUUGUAGCUGGGCCCGga |
| nurim (nuclear envelope membrane protein) | GCCUCAAACAGGUAUACUAtt | UAGUAUACCUGUUUGAGGCcc |
| phosphatidylinositol glycan anchor biosynthesis, class K | GGACAUCGCACUGAUCUUUtt | AAAGAUCAGUGCGAUGUCCag |
| phosphatidylinositol glycan anchor biosynthesis, class K | GGCUCUAGCUAGUAGUCAAtt | UUGACUACUAGCUAGAGCCat |
| phosphatidylinositol glycan anchor biosynthesis, class K | CCAACAUAGAACUCGCGGAtt | UCCGCGAGUUCUAUGUUGGta |
| psoriasis susceptibility 1 candidate 1 | AGAAGUAACAUGUCCAAAAtt | UUUUGGACAUGUUACUUCUga |
| psoriasis susceptibility 1 candidate 1 | UCCAAGCAAUGAUAUCCAAtt | UUGGAUAUCAUUGCUUGGAgg |
| psoriasis susceptibility 1 candidate 1 | GCAAUGAUAUCCAAGGAAUtt | AUUCCUUGGAUAUCAUUGCtt |
| phosphatidylserine synthase 1 | GGAUGAUGUGAACUACAAAtt | UUUGUAGUUCACAUCAUCCtt |
| phosphatidylserine synthase 1 | GAGUGUACCUUUUCAUGAUtt | AUCAUGAAAAGGUACACUCca |
| phosphatidylserine synthase 1 | CCAUCGUCAGCCUCAUGUAtt | UACAUGAGGCUGACGAUGGtg |
| RAB1B, member RAS oncogene family | GCUGAAAUCAAAAAGCGGAtt | UCCGCUUUUUGAUUUCAGCag |
| RAB1B, member RAS oncogene family | GCACCAGCCUUAACCCUCAtt | UGAGGGUUAAGGCUGGUGCcc |
| RAB1B, member RAS oncogene family | AGAGCGACCUCACCACCAAtt | UUGGUGGUGAGGUCGCUCUtg |
| SET domain containing (lysine methyltransferase) 7 | GGACCGCACUUUAUGGGAAtt | UUCCCAUAAAGUGCGGUCCtc |
| SET domain containing (lysine methyltransferase) 7 | GCACGUAUGUAGACGGAGAtt | UCUCCGUCUACAUACGUGCcc |
| SET domain containing (lysine methyltransferase) 7 | CCUGGACGAUGACGGAUUAtt | UAAUCCGUCAUCGUCCAGGtg |
| solute carrier family 35, member B3 | CCUACAUGAUAAUAGCUUUtt | AAAGCUAUUAUCAUGUAGGtt |
| solute carrier family 35, member B3 | CUGUAUGAUUUGAUAAACAtt | UGUUUAUCAAAUCAUACAGtg |
| solute carrier family 35, member B3 | GGACCUAUGGUUAUGCGUUtt | AACGCAUAACCAUAGGUCCga |
| ST3 beta-galactoside alpha-2,3-sialyltransferase 4 | GCAGACCAUUCACUACUAUtt | AUAGUAGUGAAUGGUCUGCtt |
| ST3 beta-galactoside alpha-2,3-sialyltransferase 4 | UCUGGGAUGUCAAUCCUAAtt | UUAGGAUUGACAUCCCAGAtg |
| ST3 beta-galactoside alpha-2,3-sialyltransferase 4 | GGAAGACAGUUUUUAUUUUtt | AAAAUAAAAACUGUCUUCCcg |
| TRAF family member-associated NFKB activator | CACUCAAGAUAACAAUUAUtt | AUAAUUGUUAUCUUGAGUGga |
| TRAF family member-associated NFKB activator | GAACUAUGAGCAGAGAAUAtt | UAUUCUCUGCUCAUAGUUCtc |
| TRAF family member-associated NFKB activator | GAGAUUCUGCAGUAAAAGAtt | UCUUUUACUGCAGAAUCUCta |
| transmembrane protease, serine 6 | GGAACUUACUACAACUCCAtt | UGGAGUUGUAGUAAGUUCCca |
| transmembrane protease, serine 6 | GCCUGUGAAGUGAACCUGAtt | UCAGGUUCACUUCACAGGCct |
| transmembrane protease, serine 6 | GCUGACCGCUGGGUGAUAAtt | UUAUCACCCAGCGGUCAGCga |
| zona pellucida glycoprotein 1 (sperm receptor) | CAGUCUUCUCGGCCGAUUAtt | UAAUCGGCCGAGAAGACUGca |
| zona pellucida glycoprotein 1 (sperm receptor) | ACACUGGGAUGUGAACAAAtt | UUUGUUCACAUCCCAGUGUtc |
| zona pellucida glycoprotein 1 (sperm receptor) | CACCCACUGUGGAACCACAtt | UGUGGUUCCACAGUGGGUGag |

**Supplementary Table. 4. Generation of CLIC1 CRIPSR transgenic BTSCs**. Two different gRNA was employed to generate CLIC1-CRISPR monoallelic and biallelic deletions in BTSC73 and BTSC147. The sequences for the gRNAs as well as the primers employed to screen each clone are listed.

| gRNA1-CLIC1-Fwd | caccGTCAACGGTGGTAACATTGA |
| --- | --- |
| gRNA1-CLIC1-RC | aaacTCAATGTTACCACCGTTGAC |
| gRNA2-CLIC1-Fwd | caccGTACCGATGCACTCCCCGGA |
| gRNA2-CLIC1-RC | aaacTCCGGGGAGTGCATCGGTAC |
| CLIC1 Internal-Fwd | TAGCTGAGGTTCCTCCCAGG |
| CLIC1 Internal-Rev | TATTCCTCCCAGGACCCAGG |
| CLIC1 External-Fwd | AGGGACTGGCCTAGGGATG |
| CLIC1 External-Rev | AAAATGGAGGGGGTTGAGGG |

**Supplementary Table. 5.** Primer sequences for OSMR, CLIC1 and the housekeeping genes, GUSB and ACTB, are provided.

| **Gene** | **Forward Primer Sequence** | **Reverse Primer sequence** |
| --- | --- | --- |
| GUSB | GCGTTCCTTTTGCGAGGAGA | GGTGGTATCAGTCTTGCTCAA |
| ACTB | CAGCAGATGTGGATCAGCAAG | GCATTTGCGGTGGACGAT |
| OSMR | ACTGGAACCTGCCACAGAGT | TCCAAGCTCACAATTCTCCA |
| CLIC1 | ACCGCAGGTCGAATTCTTC | ACGGTGGTAACATTGAAGGTG |

a

b

c

a

b

c

d

**Supplemental Fig. 1 | Related to Fig. 2f-i. Assessing efficiency of CLIC1 knockdown in different BTSCs**. BTSC73, BTSC147, BTSC12, and BTSC30 cells were transfected with an siRNA pool targeting CLIC1 (siCLIC1) or non targeting siRNA control (siCTL).

**a-d**,mRNA expression of CLIC1 in each BTSC line was assessed by RT-qPCR and data was normalized to the housekeeping gene, GUSB. **e-h**, BTSCs were subjected to immunoblotting analysis using an antibody to CLIC1 and the CLIC1 protein expression level was normalized to ACTIN, n=3 biological replicates. Statistical analysis was performed using a student t-test. **P* < 0.05, ***P* < 0.01, ****P* < 0.001.

e

**Supplemental Fig. 2. Effects of CLIC1 Knockdown (KD) on BTSC viability and sephere size. a**, BTSC147 was transfected with an siRNA targeting CLIC1 (siCLIC1) or non targeting siRNA control (siCTL) and mRNA expression of CLIC1 was assessed by RT-qPCR. Data was normalized to the housekeeping gene, GUSB. **b**, The protein expression of CLIC1 was assessed by immunoblotting using a CLIC1antibody. Tubulin was used as a loading control. **c,d**, Proliferation ability plotted based on the number of viable cells counted using trypan blue exclusion dye (**c**). ell viability was plotted as fold change based on the initial count on day1 for each condition (**d**). A student-t test was used to compare two conditions at day 7. Data are presented as mean ± SD, n = 3 biological replicates, non-significant (ns), **P* < 0.05. **e**, Representative images of siCLIC1 and siCTL sphere sizes following 3 days of incubation at 37°C and 5% CO2. Sphere images were taken using 10x (top panel, scale bar 100 μm) and 20x (bottom panel, scale bar 100 μm) objectives. **f**, Sphere size was quantified. A minimum of 100 spheres was assessed from each biological replicate and data was plotted as a mean ± SD. A student-t test was used to identify significance, ***P* < 0.01.

**Supplemental Fig. 3.** **Generation of CLIC1 CRISPR in BTSCs**.

Two different transgenic CLIC1 CRISPR lines were generated for each of BTSC147 and BTSC73.

**a,b**, The protein expression of CLIC1 was assessed by immunoblotting using a CLIC1antibody and tubulin was used as a loading control. **c**, Proliferation ability plotted based on the number of viable cells counted using trypan blue exclusion dye. **d**, Proliferation capability plotted as fold change based on the initial count on day1 for each condition. A student-t test was used to compare two conditions at day 7. Data are presented as mean ± SD, n=3 biological replicates, non-significant (ns), **p<0.01. **e**, Representative images of CLIC1-CRISPR cells and control BTSC147 sphere sizes following 3 days of incubation at 37°C and 5% CO2. Sphere images were taken using 10x (top panel, scale bar 100 μm) and 20x (bottom panel, scale bar 100 μm) objectives. **f**, Sphere sizes in CRISPR and control BTSC147 were quantified. A minimum of 100 spheres was assessed from each biological replicate and data was plotted as a mean ± SD. A student-t test was used to identify significance, ****P* < 0.001.

**Supplemental Fig. 4. Subcellular localization of CLIC1 in BTSC**.

**a**, BTSC73or **b**, BTSC147 were subjected to subcellular fractionation and cytoplasmic, C, and plasma membrane, PM, fractions were analyzed by immunoblotting using the indicated antibodies. Whole cell lysates were loaded on the same gel. Na+/K+ ATPase and GAPDH were used as PM and cytoplasmic markers, respectively. High and low exposure images are shown for CLIC1 expression. n = 3 biological replicates.

**Supplemental Fig. 5 | Related to Fig. 6a-c. Extracellular vesicles (EVs) isolation.**

BTSC73 cell supernatant was centrifuged at 200 x g for 10 minutes, 300 x g for 10 minutes, 2,000 x g for 10 minutes, 10,000 x g for 30 minutes, and 100,000 x g for 2 hours, respectively. After removing the supernatant and resuspending the EV pellet in PBS, the resulting pellet was then washed and centrifuged at 49,000 rpm for 30 minutes. **a**, Particle size distributions (PSDs) for BTSC73 were analyzed in the range of 0-1000 nm using ZetaView. **b**, EV and whole cell lysates fractions from CLIC1 CRISPRs and control BTSC73 were analyzed by immunoblotting using annotated antibodies.

**Supplemental Fig. 6 | Related to Fig. 6h-m. Pharmacological inhibition of PM-CLIC1 attenuates the phosphorylation of STAT3 and EGFR.**

BTSC73, BTSC147, and BTSC30, as well as corresponding CLIC1-CRISPR BTSCs were treated with a monoclonal tmCLIC1mab or IgG control. The whole cell lysates were subjected to immunoblotting analysis using antibodies indicated on the blots. ACTIN was used as a loading control.

**Supplemental Fig. 7 | Related to Fig. 1. Characterization of OSMR bait induction in MaMTH HEK293T reporter cells.** Western blot analysis of HEK293T reporter cells transfected with OSMR MaMTH bait construct verifying that tagged OSMR is properly expressed in response to induction with 0.5 mg/ml tetracycline, with no detectable leakage in the absence of inducer. ‘OSMR A’ and ‘OSMR B’ correspond to MaMTH bait constructs tagged at their C-terminus with Cub-GAL4TF-V5 or Cub-GAL4TF-V5-P2A-tagBFP, respectively. GAPDH was used as a loading control.

**Supplementary Methods**

**BTSC culture**

Prior to use in experiments, BTSC lines were thawed from a cryopreserved state (10% dimethyl sulfoxide -DMSO) and placed in BTSC media containing serum-free NeuroCult NS-A medium (StemCell Technologies, Inc., #05750), supplemented with 100 U/ml penicillin, 100 μg/ml streptomycin (Sigma Aldrich, P4333), heparin (2 μg/ml, StemCell Technologies, Inc., #07980), human EGF (20 ng/ml, Miltenyi Biotec, #130-093-825), and human FGF (10 ng/ml, Miltenyi Biotec, #130-093-838). Cultures were kept in T-75 or T-25 culture flask for cells in suspension (Sarstedt #833911502, 833910502) and grown as spheres in suspension. All cell lines were subject to analysis for the presence of mycoplasma using the PCR method. Passaging of BTSC spheres was done every 3-7 days or once spheres reached 200-250 µm in size. This was accomplished by collecting media containing BTSC spheres followed by centrifugation at 1000 x g for 10 mins. Cells were dissociated into a single cell suspension by incubating with 0.2 ml Accumax dissociation solution (Innovative Cell Technologies, #AM105) for 10 minutes at 37°C followed by the addition of 0.8 ml BTSC media. Utilizing Trypan Blue Stain 0.4% (Gibco, #15250-061), cells were counted and subsequently transferred onto low attachment flasks for culturing in BTSC suspension media. Cell plating densities were determined based on the size of the plating vessel (T-75 or T-25 flask) and the duration of the desired incubation (3-7 days).

**Cell population growth assay**

BTSC spheres were processed into a single-cell suspension using Accumax dissociation solution (Innovative Cell Technologies, #AM105). Single cells were plated at a density of 30,000 or 50,000 cells per well (6-well plate) in 2 ml BTSC media for CRISPR/CAS9 clones and siRNA experiments, respectively. 1 day (24 hours), 3 days (72 hours), and 7 days (168 hours) following plating, cells were collected, and live cells were assessed using trypan blue exclusion dye (Gibco #15250-061). This dye differentiates live and dead cells by the uptake or lack of uptake of a blue dye. Counts were done using an automated cell counter (Countess II FL Automated Cell Counter).

**Sphere size assessment**

Sphere size assessment was used to determine any differences in size between BTSC WT spheres, or spheres generated from either siRNA transient knockdown or CRISPR-CAS9 stable knockdown, or knockout. BTSC spheres were collected and processed into a single cell suspension using Accumax dissociation solution (Innovative Cell Technologies, #AM105). Cells were plated as follows: 3 to 6 wells containing 500, 250, and 125 cells respectively in 100 ul BTSC media in a 96-well plate. The purpose of doing this was to ensure that the plating density did not impact the size of the spheres. By maintaining consistent plating densities, potential confounding factors affecting sphere size could be mitigated, allowing for a more accurate and reliable assessment of experimental results. 72 hours following plating and incubation, sphere size was assessed, and visualizations captured using a scanning microscope (Olympus LS, IXplore Pro Automated Microscope system) equipped with the adjoining imaging software (Olympus LS, cellSens Version 1.12) using the ‘Measure’ feature at 10-20x objective magnification.

**Cell Fractionation**

The plasma membrane and cytoplasm were separated using the Thermofisher Subcellular Protein Fractionation Kit (Thermofisher, #78840), following the manufacturer's protocol. Briefly, 5 × 107 BTSCs were rinsed once with 1 ml of 1X PBS containing 0.3% BSA and then with 1 ml of 0.9% sodium chloride solution. For cytoplasm extraction, cells were treated with 500 μl of cytoplasmic extraction buffer (CEB) and shaken for approximately five minutes at 4°C. After centrifugation at 500 x g for 5 minutes, the supernatant was carefully collected. For plasma membrane extraction, the pellet was incubated with 500μl of membrane extraction buffer and shaken for approximately five minutes at 4°C. Subsequently, the cells were centrifuged at 3000 x g for 5 minutes, and the supernatant was collected1. Protein concentration of cytosolic, and plasma membrane lysates was determined using the Bradford assay (Bio-Rad, #5000006) and 10 ug of protein was loaded in a 10% SDS PAGE gel.

**Electroporation of BTSC**

BTSC electroporation was conducted in accordance with our established protocols2. Briefly, at a concentration of 100nM, siRNA was delivered to patient-derived BTSCs using electroporation as described by the AMAXA nucleofector 2b device, set at 1300 volts (Lonza, #AAB1001). Electroporated cells were plated in a T-75 culture flask in suspension containing BTSC media and incubated at 37°C and 5% CO2. Plating for experiments took place 24 hours after electroporation while collection of cells for gene expression analysis by RT-qPCR and protein expression by Immunoblotting were done 72 hours after electroporation.

**Gene expression analysis**

RNA was extracted from cells using the TRIzol method. In this method, pelleted cells are incubated with 1 ml TRIzol digestive reagent (Invitrogen, #15596026) at room temperature for 5 minutes. Next, 0.2 ml chloroform (Sigma Aldrich, #288306) was added to the samples and shaken vigorously for 20 seconds followed by a 2–3-minute incubation at room temperature (22-25°C). Samples were then centrifuged for 15 minutes at 12000 x g, 4°C after which 0.5 ml of the upper aqueous phase was added to a clean tube containing 0.5ml isopropanol. Samples were again incubated at room temperature (22-25°C) for 15 minutes followed by centrifugation at 12000 x g for 10 minutes, 4°C. The resultant supernatant was removed from each sample and the RNA pellet was washed first with 75% Ethanol and 100% Ethanol. Each wash step was followed by centrifugation at 7500 x g for 5 mins (4°C). The supernatant was removed, and RNA samples were left to dry for 10 minutes at room temperature (22-25°C) in a sterile biological hood. The RNA pellet was dissolved in 20-50 μl RNase-free water and incubated at 55-60°C for 10-15 minutes to ensure RNA dissolution. cDNA was obtained by reverse transcription using the 5X All-In-One RT MasterMix cDNA synthesis system (abm, #G592). Gene expression data was obtained from RT-qPCR analysis using the fluorescent dye SYBR Green (Biorad, #1725271) and primers, as described in **Supp. Table 5**, by combining 1μl of 5 mM forward primer, 1 μl 5 mM of the reverse primer and 5 μl SYBR Green to make the PCR mix. This mix was used to generate a final plated mix of 3μl of 30ng cDNA and 7μl PCR mix that was run on the QuantStudioTM 7 Flex Real-Time PCR System (Applied Biosystems). mRNA expression levels were normalized to one of two housekeeping genes: beta-glucuronidase (*GUSB*) and beta-actin (*ACTB*).

**Immunoblotting and antibodies**

Protein expression was analyzed by SDS PAGE as previously described2. Total protein from samples was harvested from a minimum of 5x105 using 1X RIPA Buffer (Thermo Fisher Scientific, #89900) supplemented with protease and phosphatase inhibitors (Thermo Fisher Scientific, #A32959). Following cell lysis, protein concentration was assessed using Bradford Assay (Bio-Rad), after which samples were run on a 10-15% SDS-PAGE gel and transferred on a Nitrocellulose Membrane 0.45սm (Bio-Rad, #1620115) for 1 hour and 30 minutes at 100 volts. Membranes were blocked for non-specific binding using 5% bovine serum albumin (BSA) in 1X TBST for 1-2 hours. Subsequently, the membranes were incubated with primary antibodies at 4°C overnight, followed by horseradish peroxidase (HRP)-conjugated secondary antibodies in a 5% bovine serum albumin (BSA) blocking solution. Proteins of interest were visualised by ClarityTM Western ECL Substrate (BioRad, 170-5060) using ChemiDoc Imaging System (Biorad). The antibodies used for immunoblotting include anti-OSMR (1:100, Santa Cruz Biotechnology, sc-271695, mouse), anti-CLIC1 (1:200, Santa Cruz Biotechnology, sc-81873, mouse), α-Tubulin (1:5000, Abcam, ab4074, mouse), HRP-conjugated secondary antibody (1:5000, BioRad, 1706516, mouse).

**Extreme Limiting Dilution Assay (ELDA)**

A single cell suspension and followed by dilution using BTSC complete media to generate a final plated density of 25, 12, 6, 3 and 1 cell per well. 100μl of the diluted single-cell suspensions was plated in a 96-well plate as follows: 12 wells plated for dilution 25, 12, 6, and 3 cells per well and 48 wells (4 replicates of 12 wells) plated for 1 cell per well dilution3. This was done for 1 cell per well plating to achieve comparable results as many times single cell death can occur following plating. Plates were incubated at 37 °C and 5% CO2 for 7 days after which sphere formation was assessed. Analysis of the responding wells as a function of the plated wells was undertaken and data was input into an online software available at <https://bioinf.wehi.edu.au/software/elda/>. Using this data provided by the software, the number of cells required to generate a positive well (having a sphere) was determined for each condition. Stem cell frequency (SCF) or the probability of finding a stem cell in the bulk sample of cells was also given as a value of 1/stem cell frequency. To determine percent SCF 1/stem cell frequency was multiplied by 100.

**Duolink Proximity Ligation Assay (PLA)**

Single cell BTSC suspension was plated on Nunc Lab-Tek, II CC2 Chamber Slide System (Thermo Scientific, #154941) that was coated overnight with a Poly-D-Lysine (PDL) coating. The working PDL solution (10 µg/ml) was made from a 2 mg/ml stock (Fisher Scientific, # CB-40210) using sterile water and incubated on the chamber slide overnight at 37 °C and washed thoroughly (3 times) with sterile water prior to addition of cell suspension. Following Accumax (Innovative Cell Technologies, #AM105) dissociation the single cell suspension was plated at a density of ~2.5x104 cells in media containing 10% FBS for 1 to 6 hours until cells had visible projections. Following incubation, cells were quickly washed with 1X PBS and fixed using 4% paraformaldehyde for 15 min at room temperature. Next, samples were washed with 1X PBS and permeabilized using 0.5% Triton X-100 for 25 mins and subsequently blocked for non-specifying binding for 1 hour using the Duolink Blocking Solution provided in the starter kit with agitation at 37 °C. Samples were then incubated overnight at 4 °C in a humid chamber with primary antibodies against the protein of interest: anti-OSMR (1:400, Abnova, H00009180-D01P, rabbit) and anti-CLIC1 (1:400, Santa Cruz Biotechnology, sc-81873, mouse). Following overnight incubation, samples were washed with Wash Buffer A (available in the Starter Kit) and incubated with the PLUS and MINUS oligonucleotide probes conjugated to secondary antibodies for 1 h at 37 °C in a humid chamber. Samples were subsequently washed with Wash Buffer A and incubated with Ligation Buffer with Ligase (available in the Starter Kit) for 30 minutes at 37 °C in a humid chamber. Rolling Circle Amplification (RCA) was achieved by washing samples with Wash Buffer A and incubating with polymerase and amplification solution (available in the Starter Kit) containing nucleotides for 100 mins at 37 °C in a humid chamber and protected from light. Following RCA, samples were washed with Wash Buffer B and mounted with Duolink *In Situ* Mounting Medium (DUO82040, Sigma). PLA signals were visualized and captured by a laser scanning microscope (Olympus LS, IXplore Pro Automated Microscope system) equipped with the adjoining imaging software (Olympus LS, cellSens Version 1.12) at 40-60X objective magnification.

**References**

1 Sharanek, A., Raco, L., Soleimani, V. D. & Jahani-Asl, A. in *Methods in Cell Biology* Vol. 170 47-58 (Elsevier, 2022).

2 Sharanek, A. *et al.* Transcriptional control of brain tumor stem cells by a carbohydrate binding protein. *Cell reports* **36** (2021).

3 Rasool, D., Soleimani, V. D. & Jahani-Asl, A. in *Neuronal Cell Death: Methods and Protocols* 343-354 (Springer, 2022).
