# Supplementary material for: Transmembrane CLIC1 sustains EGFRvIII–STAT3 oncogenic signaling in Glioblastoma through interaction with OSMR
Source: Research Square preprint supplement (doi:10.21203/rs.3.rs-6537096/v1), 2025-05-05
Supplement: Supplementary file 2 [file 95b733be127dcba21ace206d.xlsx]

## Sheet: Sheet1
Bait UniProt	Prey UniProt	Bait Symbol	Prey Symbol	Detected by MaMTH (high conf / low conf / NA)	Novel MaMTH PPI (not in experimental IID)	In IID	IID experimental	IID predicted	IID orthologous	Prey category
Q99650	Q6JQN1	OSMR	ACAD10	high conf	y	n	n	n	n	interacts with OSMR, not with OSMR/EGFRvIII
Q99650	Q96QU6	OSMR	ACCS	high conf	y	n	n	n	n	interacts with OSMR, not with OSMR/EGFRvIII
Q99650	Q04771	OSMR	ACVR1	low conf	y	y	n	y	n	interacts with OSMR, not with OSMR/EGFRvIII
Q99650	P55008	OSMR	AIF1	high conf	y	n	n	n	n	interacts with OSMR, not with OSMR/EGFRvIII
Q99650	O95831	OSMR	AIFM1	high conf	y	n	n	n	n	interacts with OSMR, not with OSMR/EGFRvIII
Q99650	Q9NVV5	OSMR	AIG1	high conf	y	n	n	n	n	interacts with OSMR, not with OSMR/EGFRvIII
Q99650	Q9NP61	OSMR	ARFGAP3	high conf	y	n	n	n	n	interacts with OSMR, not with OSMR/EGFRvIII
Q99650	Q53QZ3	OSMR	ARHGAP15	high conf	y	n	n	n	n	interacts with OSMR, not with OSMR/EGFRvIII
Q99650	Q9UII2	OSMR	ATPIF1	high conf	y	n	n	n	n	interacts with OSMR, not with OSMR/EGFRvIII
Q99650	Q9NY97	OSMR	B3GNT2	high conf	y	n	n	n	n	interacts with OSMR, not with OSMR/EGFRvIII
Q99650	P51572	OSMR	BCAP31	high conf	y	n	n	n	n	interacts with OSMR and with OSMR/EGFRvIII
Q99650	Q9BZR8	OSMR	BCL2L14	high conf	y	n	n	n	n	interacts with OSMR and with OSMR/EGFRvIII
Q99650	Q7Z5L2	OSMR	C10orf28	high conf	y	n	n	n	n	interacts with OSMR, not with OSMR/EGFRvIII
Q99650	Q9BRX8	OSMR	C10orf58	high conf	y	n	n	n	n	interacts with OSMR, not with OSMR/EGFRvIII
Q99650	Q9NWQ9	OSMR	C14orf119	high conf	y	n	n	n	n	interacts with OSMR, not with OSMR/EGFRvIII
Q99650	Q86TU6	OSMR	C14orf70	high conf	y	n	n	n	n	interacts with OSMR, not with OSMR/EGFRvIII
Q99650	Q3B7S5	OSMR	C18orf62	high conf	y	n	n	n	n	interacts with OSMR and with OSMR/EGFRvIII
Q99650	A8MVS5	OSMR	C19orf38	high conf	y	n	n	n	n	interacts with OSMR, not with OSMR/EGFRvIII
Q99650	Q9Y284	OSMR	C19orf56	high conf	y	n	n	n	n	interacts with OSMR, not with OSMR/EGFRvIII
Q99650	Q8N8X9	OSMR	C1orf161	high conf	y	n	n	n	n	interacts with OSMR, not with OSMR/EGFRvIII
Q99650	Q8N268	OSMR	C20orf197	high conf	y	n	n	n	n	interacts with OSMR, not with OSMR/EGFRvIII
Q99650	Q9UJQ7	OSMR	C20orf79	high conf	y	n	n	n	n	interacts with OSMR, not with OSMR/EGFRvIII
Q99650	Q9NUD7	OSMR	C20orf96	high conf	y	n	n	n	n	interacts with OSMR, not with OSMR/EGFRvIII
Q99650	Q8WVX3	OSMR	C4orf3	high conf	y	n	n	n	n	interacts with OSMR, not with OSMR/EGFRvIII
Q99650	Q96CB5	OSMR	C8orf44	high conf	y	n	n	n	n	interacts with OSMR and with OSMR/EGFRvIII
Q99650	Q6ZUL3	OSMR	C8orf86	high conf	y	n	n	n	n	interacts with OSMR, not with OSMR/EGFRvIII
Q99650	Q9HBL7	OSMR	C9orf46	high conf	y	n	n	n	n	interacts with OSMR, not with OSMR/EGFRvIII
Q99650	P13236	OSMR	CCL4	high conf	y	n	n	n	n	interacts with OSMR, not with OSMR/EGFRvIII
Q99650	P24863	OSMR	CCNC	high conf	y	n	n	n	n	interacts with OSMR, not with OSMR/EGFRvIII
Q99650	P16671	OSMR	CD36	high conf	y	n	n	n	n	interacts with OSMR, not with OSMR/EGFRvIII
Q99650	P32970	OSMR	CD70	high conf	y	n	n	n	n	interacts with OSMR, not with OSMR/EGFRvIII
Q99650	P56856	OSMR	CLDN18	high conf	y	n	n	n	n	interacts with OSMR, not with OSMR/EGFRvIII
Q99650	Q2HXU8	OSMR	CLEC12B	high conf	y	n	n	n	n	interacts with OSMR, not with OSMR/EGFRvIII
Q99650	Q92478	OSMR	CLEC2B	high conf	y	n	n	n	n	interacts with OSMR and with OSMR/EGFRvIII
Q99650	Q9BXN2	OSMR	CLEC7A	high conf	y	n	n	n	n	interacts with OSMR, not with OSMR/EGFRvIII
Q99650	O00299	OSMR	CLIC1	high conf	y	n	n	n	n	interacts with OSMR and with OSMR/EGFRvIII
Q99650	Q9HAZ1	OSMR	CLK4	high conf	y	n	n	n	n	interacts with OSMR, not with OSMR/EGFRvIII
Q99650	Q9UBY8	OSMR	CLN8	high conf	y	n	n	n	n	interacts with OSMR, not with OSMR/EGFRvIII
Q99650	Q9Y6Z7	OSMR	COLEC10	high conf	y	n	n	n	n	interacts with OSMR, not with OSMR/EGFRvIII
Q99650	Q7L5N1	OSMR	COPS6	high conf	y	n	n	n	n	interacts with OSMR, not with OSMR/EGFRvIII
Q99650	O43889	OSMR	CREB3	high conf	y	n	n	n	n	interacts with OSMR and with OSMR/EGFRvIII
Q99650	P22914	OSMR	CRYGS	high conf	y	n	n	n	n	interacts with OSMR, not with OSMR/EGFRvIII
Q99650	Q8N6G5	OSMR	CSGALNACT2	high conf	y	n	n	n	n	interacts with OSMR and with OSMR/EGFRvIII
Q99650	O96002	OSMR	CXorf1	high conf	y	n	n	n	n	interacts with OSMR and with OSMR/EGFRvIII
Q99650	P81605	OSMR	DCD	high conf	y	n	n	n	n	interacts with OSMR, not with OSMR/EGFRvIII
Q99650	P27707	OSMR	DCK	high conf	y	n	n	n	n	interacts with OSMR, not with OSMR/EGFRvIII
Q99650	P07585	OSMR	DCN	high conf	y	n	n	n	n	interacts with OSMR and with OSMR/EGFRvIII
Q99650	Q9UMR2	OSMR	DDX19B	high conf	y	n	n	n	n	interacts with OSMR, not with OSMR/EGFRvIII
Q99650	Q8N690	OSMR	DEFB119	high conf	y	n	n	n	n	interacts with OSMR, not with OSMR/EGFRvIII
Q99650	Q9H1M4	OSMR	DEFB127	high conf	y	n	n	n	n	interacts with OSMR, not with OSMR/EGFRvIII
Q99650	Q9Y5T4	OSMR	DNAJC15	high conf	y	n	n	n	n	interacts with OSMR, not with OSMR/EGFRvIII
Q99650	Q92782	OSMR	DPF1	high conf	y	n	n	n	n	interacts with OSMR, not with OSMR/EGFRvIII
Q99650	Q6UX65	OSMR	DRAM2	high conf	y	n	n	n	n	interacts with OSMR, not with OSMR/EGFRvIII
Q99650	Q9BZQ6	OSMR	EDEM3	high conf	y	n	n	n	n	interacts with OSMR, not with OSMR/EGFRvIII
Q99650	Q9H9G7	OSMR	EIF2C3	high conf	y	n	n	n	n	interacts with OSMR and with OSMR/EGFRvIII
Q99650	Q9H5J4	OSMR	ELOVL6	high conf	y	n	n	n	n	interacts with OSMR, not with OSMR/EGFRvIII
Q99650	Q92979	OSMR	EMG1	high conf	y	n	n	n	n	interacts with OSMR, not with OSMR/EGFRvIII
Q99650	P01588	OSMR	EPO	high conf	y	y	n	y	n	interacts with OSMR, not with OSMR/EGFRvIII
Q99650	Q6UWZ7	OSMR	FAM175A	high conf	y	n	n	n	n	interacts with OSMR, not with OSMR/EGFRvIII
Q99650	Q7Z5A9	OSMR	FAM19A1	high conf	y	n	n	n	n	interacts with OSMR, not with OSMR/EGFRvIII
Q99650	Q8N5C1	OSMR	FAM26E	high conf	y	n	n	n	n	interacts with OSMR, not with OSMR/EGFRvIII
Q99650	Q9BXW9	OSMR	FANCD2	high conf	y	n	n	n	n	interacts with OSMR, not with OSMR/EGFRvIII
Q99650	Q14314	OSMR	FGL2	high conf	y	n	n	n	n	interacts with OSMR, not with OSMR/EGFRvIII
Q99650	Q6PIW4	OSMR	FIGNL1	high conf	y	n	n	n	n	interacts with OSMR, not with OSMR/EGFRvIII
Q99650	Q9Y3D6	OSMR	FIS1	high conf	y	n	n	n	n	interacts with OSMR, not with OSMR/EGFRvIII
Q99650	Q99518	OSMR	FMO2	high conf	y	n	n	n	n	interacts with OSMR, not with OSMR/EGFRvIII
Q99650	Q9Y231	OSMR	FUT9	high conf	y	n	n	n	n	interacts with OSMR, not with OSMR/EGFRvIII
Q99650	P0DTW1	OSMR	GAGE1	high conf	y	n	n	n	n	interacts with OSMR, not with OSMR/EGFRvIII
Q99650	P02774	OSMR	GC	high conf	y	n	n	n	n	interacts with OSMR and with OSMR/EGFRvIII
Q99650	P17302	OSMR	GJA1	high conf	y	n	n	n	n	interacts with OSMR, not with OSMR/EGFRvIII
Q99650	P35754	OSMR	GLRX	high conf	y	n	n	n	n	interacts with OSMR and with OSMR/EGFRvIII
Q99650	Q68CQ7	OSMR	GLT8D1	high conf	y	n	n	n	n	interacts with OSMR, not with OSMR/EGFRvIII
Q99650	Q86WP2	OSMR	GPBP1	high conf	y	n	n	n	n	interacts with OSMR and with OSMR/EGFRvIII
Q99650	P43304	OSMR	GPD2	high conf	y	n	n	n	n	interacts with OSMR, not with OSMR/EGFRvIII
Q99650	Q9UJ42	OSMR	GPR160	high conf	y	n	n	n	n	interacts with OSMR, not with OSMR/EGFRvIII
Q99650	A4D1E9	OSMR	GTPBP10	high conf	y	n	n	n	n	interacts with OSMR, not with OSMR/EGFRvIII
Q99650	Q16661	OSMR	GUCA2B	high conf	y	n	n	n	n	interacts with OSMR, not with OSMR/EGFRvIII
Q99650	P55084	OSMR	HADHB	high conf	y	n	n	n	n	interacts with OSMR, not with OSMR/EGFRvIII
Q99650	Q15011	OSMR	HERPUD1	high conf	y	n	n	n	n	interacts with OSMR, not with OSMR/EGFRvIII
Q99650	P68431	OSMR	HIST1H3C	high conf	y	n	n	n	n	interacts with OSMR, not with OSMR/EGFRvIII
Q99650	Q8WW32	OSMR	HMGB4	high conf	y	n	n	n	n	interacts with OSMR, not with OSMR/EGFRvIII
Q99650	Q86YM7	OSMR	HOMER1	high conf	y	n	n	n	n	interacts with OSMR, not with OSMR/EGFRvIII
Q99650	P25021	OSMR	HRH2	high conf	y	n	n	n	n	interacts with OSMR, not with OSMR/EGFRvIII
Q99650	P37059	OSMR	HSD17B2	high conf	y	n	n	n	n	interacts with OSMR, not with OSMR/EGFRvIII
Q99650	P28566	OSMR	HTR1E	high conf	y	n	n	n	n	interacts with OSMR, not with OSMR/EGFRvIII
Q99650	P05014	OSMR	IFNA4	high conf	y	n	n	n	n	interacts with OSMR, not with OSMR/EGFRvIII
Q99650	P01602	OSMR	IGKV1-5	high conf	y	n	n	n	n	interacts with OSMR, not with OSMR/EGFRvIII
Q99650	P35225	OSMR	IL13	high conf	y	y	n	y	n	interacts with OSMR, not with OSMR/EGFRvIII
Q99650	Q14005	OSMR	IL16	low conf	y	y	n	y	n	interacts with OSMR, not with OSMR/EGFRvIII
Q99650	Q9NYY1	OSMR	IL20	low conf	y	y	n	y	n	interacts with OSMR, not with OSMR/EGFRvIII
Q99650	Q6UXL0	OSMR	IL20RB	high conf	y	y	n	y	n	interacts with OSMR, not with OSMR/EGFRvIII
Q99650	Q6UWB1	OSMR	IL27RA	low conf	y	y	n	y	n	interacts with OSMR, not with OSMR/EGFRvIII
Q99650	P31785	OSMR	IL2RG	low conf	y	y	n	y	n	interacts with OSMR, not with OSMR/EGFRvIII
Q99650	P05112	OSMR	IL4	low conf	y	y	n	y	n	interacts with OSMR, not with OSMR/EGFRvIII
Q99650	Q96T52	OSMR	IMMP2L	high conf	y	n	n	n	n	interacts with OSMR and with OSMR/EGFRvIII
Q99650	Q99712	OSMR	KCNJ15	high conf	y	n	n	n	n	interacts with OSMR, not with OSMR/EGFRvIII
Q99650	P48544	OSMR	KCNJ5	high conf	y	n	n	n	n	interacts with OSMR, not with OSMR/EGFRvIII
Q99650	Q14695	OSMR	KIAA0087	high conf	y	n	n	n	n	interacts with OSMR, not with OSMR/EGFRvIII
Q99650	Q9NZY2	OSMR	KIAA0125	high conf	y	n	n	n	n	interacts with OSMR, not with OSMR/EGFRvIII
Q99650	P43630	OSMR	KIR3DL2	low conf	y	y	n	y	n	interacts with OSMR, not with OSMR/EGFRvIII
Q99650	Q9UHV8	OSMR	LGALS13	high conf	y	n	n	n	n	interacts with OSMR, not with OSMR/EGFRvIII
Q99650	P05162	OSMR	LGALS2	high conf	y	n	n	n	n	interacts with OSMR, not with OSMR/EGFRvIII
Q99650	Q9UPQ0	OSMR	LIMCH1	high conf	y	n	n	n	n	interacts with OSMR, not with OSMR/EGFRvIII
Q99650	Q6P2S7	OSMR	LOC253724	high conf	y	n	n	n	n	interacts with OSMR, not with OSMR/EGFRvIII
Q99650	Q92604	OSMR	LPGAT1	high conf	y	n	n	n	n	interacts with OSMR, not with OSMR/EGFRvIII
Q99650	Q96JM4	OSMR	LRRIQ1	high conf	y	n	n	n	n	interacts with OSMR and with OSMR/EGFRvIII
Q99650	Q13021	OSMR	MALL	high conf	y	n	n	n	n	interacts with OSMR, not with OSMR/EGFRvIII
Q99650	P27816	OSMR	MAP4	high conf	y	n	n	n	n	interacts with OSMR and with OSMR/EGFRvIII
Q99650	Q8NDC0	OSMR	MAPK1IP1L	high conf	y	n	n	n	n	interacts with OSMR, not with OSMR/EGFRvIII
Q99650	P33993	OSMR	MCM7	high conf	y	n	n	n	n	interacts with OSMR, not with OSMR/EGFRvIII
Q99650	Q9HCE5	OSMR	METTL14	high conf	y	n	n	n	n	interacts with OSMR, not with OSMR/EGFRvIII
Q99650	P55197	OSMR	MLLT10	high conf	y	n	n	n	n	interacts with OSMR, not with OSMR/EGFRvIII
Q99650	Q9BYG7	OSMR	MRO	high conf	y	n	n	n	n	interacts with OSMR, not with OSMR/EGFRvIII
Q99650	Q96JQ5	OSMR	MS4A4A	high conf	y	n	n	n	n	interacts with OSMR, not with OSMR/EGFRvIII
Q99650	Q9P289	OSMR	MST4	high conf	y	n	n	n	n	interacts with OSMR, not with OSMR/EGFRvIII
Q99650	Q8WY64	OSMR	MYLIP	high conf	y	n	n	n	n	interacts with OSMR, not with OSMR/EGFRvIII
Q99650	P41227	OSMR	NAA10	high conf	y	n	n	n	n	interacts with OSMR, not with OSMR/EGFRvIII
Q99650	Q9UHE5	OSMR	NAT8	high conf	y	n	n	n	n	interacts with OSMR and with OSMR/EGFRvIII
Q99650	Q9HCH0	OSMR	NCKAP5L	high conf	y	n	n	n	n	interacts with OSMR, not with OSMR/EGFRvIII
Q99650	Q7Z6G3	OSMR	NECAB2	high conf	y	n	n	n	n	interacts with OSMR, not with OSMR/EGFRvIII
Q99650	Q16649	OSMR	NFIL3	high conf	y	n	n	n	n	interacts with OSMR, not with OSMR/EGFRvIII
Q99650	P55769	OSMR	NHP2L1	high conf	y	n	n	n	n	interacts with OSMR, not with OSMR/EGFRvIII
Q99650	Q86X76	OSMR	NIT1	high conf	y	n	n	n	n	interacts with OSMR, not with OSMR/EGFRvIII
Q99650	Q9BZQ4	OSMR	NMNAT2	high conf	y	n	n	n	n	interacts with OSMR, not with OSMR/EGFRvIII
Q99650	Q8IXM6	OSMR	NRM	high conf	y	n	n	n	n	interacts with OSMR and with OSMR/EGFRvIII
Q99650	Q9BZD4	OSMR	NUF2	high conf	y	n	n	n	n	interacts with OSMR, not with OSMR/EGFRvIII
Q99650	Q8NH93	OSMR	OR1L3	high conf	y	n	n	n	n	interacts with OSMR, not with OSMR/EGFRvIII
Q99650	Q15615	OSMR	OR4D1	high conf	y	n	n	n	n	interacts with OSMR, not with OSMR/EGFRvIII
Q99650	Q7L3T8	OSMR	PARS2	high conf	y	n	n	n	n	interacts with OSMR, not with OSMR/EGFRvIII
Q99650	Q92643	OSMR	PIGK	high conf	y	n	n	n	n	interacts with OSMR and with OSMR/EGFRvIII
Q99650	P12273	OSMR	PIP	high conf	y	n	n	n	n	interacts with OSMR, not with OSMR/EGFRvIII
Q99650	P60201	OSMR	PLP1	high conf	y	n	n	n	n	interacts with OSMR, not with OSMR/EGFRvIII
Q99650	O14494	OSMR	PPAP2A	high conf	y	n	n	n	n	interacts with OSMR, not with OSMR/EGFRvIII
Q99650	P36873	OSMR	PPP1CC	high conf	y	n	n	n	n	interacts with OSMR, not with OSMR/EGFRvIII
Q99650	Q9Y2Y8	OSMR	PRG3	high conf	y	n	n	n	n	interacts with OSMR, not with OSMR/EGFRvIII
Q99650	Q9BZD7	OSMR	PRRG3	high conf	y	n	n	n	n	interacts with OSMR, not with OSMR/EGFRvIII
Q99650	O43653	OSMR	PSCA	high conf	y	n	n	n	n	interacts with OSMR, not with OSMR/EGFRvIII
Q99650	Q9UIG5	OSMR	PSORS1C1	high conf	y	n	n	n	n	interacts with OSMR and with OSMR/EGFRvIII
Q99650	P48651	OSMR	PTDSS1	high conf	y	n	n	n	n	interacts with OSMR and with OSMR/EGFRvIII
Q99650	Q96P65	OSMR	QRFPR	high conf	y	n	n	n	n	interacts with OSMR, not with OSMR/EGFRvIII
Q99650	Q9H0U4	OSMR	RAB1B	high conf	y	n	n	n	n	interacts with OSMR and with OSMR/EGFRvIII
Q99650	Q9NP90	OSMR	RAB9B	high conf	y	n	n	n	n	interacts with OSMR, not with OSMR/EGFRvIII
Q99650	Q9H628	OSMR	RERGL	high conf	y	n	n	n	n	interacts with OSMR, not with OSMR/EGFRvIII
Q99650	Q52LD8	OSMR	RFTN2	high conf	y	n	n	n	n	interacts with OSMR, not with OSMR/EGFRvIII
Q99650	P61254	OSMR	RPL26	high conf	y	n	n	n	n	interacts with OSMR, not with OSMR/EGFRvIII
Q99650	Q9BQQ7	OSMR	RTP3	high conf	y	n	n	n	n	interacts with OSMR, not with OSMR/EGFRvIII
Q99650	O00767	OSMR	SCD	high conf	y	n	n	n	n	interacts with OSMR, not with OSMR/EGFRvIII
Q99650	Q9UIL1	OSMR	SCOC	high conf	y	n	n	n	n	interacts with OSMR, not with OSMR/EGFRvIII
Q99650	Q9H9S3	OSMR	SEC61A2	high conf	y	n	n	n	n	interacts with OSMR, not with OSMR/EGFRvIII
Q99650	P48594	OSMR	SERPINB4	high conf	y	n	n	n	n	interacts with OSMR, not with OSMR/EGFRvIII
Q99650	P50452	OSMR	SERPINB8	high conf	y	n	n	n	n	interacts with OSMR, not with OSMR/EGFRvIII
Q99650	P05155	OSMR	SERPING1	high conf	y	y	n	y	n	interacts with OSMR, not with OSMR/EGFRvIII
Q99650	Q8WTS6	OSMR	SETD7	high conf	y	n	n	n	n	interacts with OSMR and with OSMR/EGFRvIII
Q99650	P11686	OSMR	SFTPC	high conf	y	n	n	n	n	interacts with OSMR, not with OSMR/EGFRvIII
Q99650	Q3KNW5	OSMR	SLC10A6	low conf	n	y	y	n	n	interacts with OSMR, not with OSMR/EGFRvIII
Q99650	Q9H1N7	OSMR	SLC35B3	high conf	y	n	n	n	n	interacts with OSMR and with OSMR/EGFRvIII
Q99650	Q1EHB4	OSMR	SLC5A12	high conf	y	n	n	n	n	interacts with OSMR, not with OSMR/EGFRvIII
Q99650	P03973	OSMR	SLPI	high conf	y	n	n	n	n	interacts with OSMR, not with OSMR/EGFRvIII
Q99650	O60493	OSMR	SNX3	high conf	y	n	n	n	n	interacts with OSMR, not with OSMR/EGFRvIII
Q99650	Q9NUQ6	OSMR	SPATS2L	high conf	y	n	n	n	n	interacts with OSMR, not with OSMR/EGFRvIII
Q99650	Q9NZD8	OSMR	SPG21	high conf	y	n	n	n	n	interacts with OSMR, not with OSMR/EGFRvIII
Q99650	P49458	OSMR	SRP9	high conf	y	n	n	n	n	interacts with OSMR, not with OSMR/EGFRvIII
Q99650	Q11206	OSMR	ST3GAL4	high conf	y	n	n	n	n	interacts with OSMR and with OSMR/EGFRvIII
Q99650	P15907	OSMR	ST6GAL1	high conf	y	n	n	n	n	interacts with OSMR, not with OSMR/EGFRvIII
Q99650	O75897	OSMR	SULT1C4	high conf	y	n	n	n	n	interacts with OSMR, not with OSMR/EGFRvIII
Q99650	Q6EEV6	OSMR	SUMO4	high conf	y	n	n	n	n	interacts with OSMR, not with OSMR/EGFRvIII
Q99650	Q8TBG9	OSMR	SYNPR	high conf	y	n	n	n	n	interacts with OSMR, not with OSMR/EGFRvIII
Q99650	Q92844	OSMR	TANK	high conf	y	n	n	n	n	interacts with OSMR and with OSMR/EGFRvIII
Q99650	P59533	OSMR	TAS2R38	high conf	y	n	n	n	n	interacts with OSMR, not with OSMR/EGFRvIII
Q99650	Q9BXF9	OSMR	TEKT3	high conf	y	n	n	n	n	interacts with OSMR, not with OSMR/EGFRvIII
Q99650	Q96H15	OSMR	TIMD4	high conf	y	n	n	n	n	interacts with OSMR, not with OSMR/EGFRvIII
Q99650	Q53R12	OSMR	TM4SF20	high conf	y	n	n	n	n	interacts with OSMR, not with OSMR/EGFRvIII
Q99650	Q15363	OSMR	TMED2	high conf	y	n	n	n	n	interacts with OSMR, not with OSMR/EGFRvIII
Q99650	Q9BVX2	OSMR	TMEM106C	high conf	y	n	n	n	n	interacts with OSMR, not with OSMR/EGFRvIII
Q99650	Q8NCL8	OSMR	TMEM116	high conf	y	n	n	n	n	interacts with OSMR, not with OSMR/EGFRvIII
Q99650	Q9NRX6	OSMR	TMEM167B	high conf	y	n	n	n	n	interacts with OSMR, not with OSMR/EGFRvIII
Q99650	Q6UXZ0	OSMR	TMIGD1	high conf	y	n	n	n	n	interacts with OSMR, not with OSMR/EGFRvIII
Q99650	Q9UL52	OSMR	TMPRSS11E	high conf	y	n	n	n	n	interacts with OSMR, not with OSMR/EGFRvIII
Q99650	Q8IU80	OSMR	TMPRSS6	high conf	y	n	n	n	n	interacts with OSMR and with OSMR/EGFRvIII
Q99650	P21580	OSMR	TNFAIP3	high conf	y	n	n	n	n	interacts with OSMR, not with OSMR/EGFRvIII
Q99650	Q9UDY6	OSMR	TRIM10	high conf	y	n	n	n	n	interacts with OSMR, not with OSMR/EGFRvIII
Q99650	O95361	OSMR	TRIM16	high conf	y	n	n	n	n	interacts with OSMR, not with OSMR/EGFRvIII
Q99650	Q309B1	OSMR	TRIM16L	high conf	y	n	n	n	n	interacts with OSMR, not with OSMR/EGFRvIII
Q99650	Q7Z4N2	OSMR	TRPM1	high conf	y	n	n	n	n	interacts with OSMR, not with OSMR/EGFRvIII
Q99650	Q6ZT98	OSMR	TTLL7	high conf	y	n	n	n	n	interacts with OSMR, not with OSMR/EGFRvIII
Q99650	Q9H313	OSMR	TTYH1	high conf	y	n	n	n	n	interacts with OSMR, not with OSMR/EGFRvIII
Q99650	Q15819	OSMR	UBE2V2	high conf	y	n	n	n	n	interacts with OSMR, not with OSMR/EGFRvIII
Q99650	Q8WVF2	OSMR	UCMA	high conf	y	n	n	n	n	interacts with OSMR, not with OSMR/EGFRvIII
Q99650	Q96RU2	OSMR	USP28	high conf	y	n	n	n	n	interacts with OSMR, not with OSMR/EGFRvIII
Q99650	P15692	OSMR	VEGFA	high conf	y	y	n	y	n	interacts with OSMR, not with OSMR/EGFRvIII
Q99650	Q8N0U8	OSMR	VKORC1L1	high conf	y	n	n	n	n	interacts with OSMR, not with OSMR/EGFRvIII
Q99650	O75436	OSMR	VPS26A	high conf	y	n	n	n	n	interacts with OSMR, not with OSMR/EGFRvIII
Q99650	Q9UBQ0	OSMR	VPS29	high conf	y	n	n	n	n	interacts with OSMR, not with OSMR/EGFRvIII
Q99650	P23381	OSMR	WARS	high conf	y	n	n	n	n	interacts with OSMR, not with OSMR/EGFRvIII
Q99650	Q9BRP8	OSMR	WIBG	high conf	y	n	n	n	n	interacts with OSMR, not with OSMR/EGFRvIII
Q99650	O60688	OSMR	YPEL1	high conf	y	n	n	n	n	interacts with OSMR, not with OSMR/EGFRvIII
Q99650	Q9NPG8	OSMR	ZDHHC4	high conf	y	n	n	n	n	interacts with OSMR, not with OSMR/EGFRvIII
Q99650	Q96E35	OSMR	ZMYND19	high conf	y	n	n	n	n	interacts with OSMR, not with OSMR/EGFRvIII
Q99650	P17026	OSMR	ZNF22	high conf	y	n	n	n	n	interacts with OSMR, not with OSMR/EGFRvIII
Q99650	Q7Z340	OSMR	ZNF551	high conf	y	n	n	n	n	interacts with OSMR, not with OSMR/EGFRvIII
Q99650	Q8IYB9	OSMR	ZNF595	high conf	y	n	n	n	n	interacts with OSMR, not with OSMR/EGFRvIII
Q99650	Q6AZW8	OSMR	ZNF660	high conf	y	n	n	n	n	interacts with OSMR, not with OSMR/EGFRvIII
Q99650	Q68DI1	OSMR	ZNF776	high conf	y	n	n	n	n	interacts with OSMR, not with OSMR/EGFRvIII
Q99650	P60852	OSMR	ZP1	high conf	y	n	n	n	n	interacts with OSMR and with OSMR/EGFRvIII
Q99650-EGFRvIII	Q9BR61	OSMR/EGFRvIII	ACBD6	high conf	y	n	n	n	n	interacts with OSMR/EGFRvIII, not with OSMR
Q99650-EGFRvIII	O14734	OSMR/EGFRvIII	ACOT8	high conf	y	n	n	n	n	interacts with OSMR/EGFRvIII, not with OSMR
Q99650-EGFRvIII	P29274	OSMR/EGFRvIII	ADORA2A	high conf	y	n	n	n	n	interacts with OSMR/EGFRvIII, not with OSMR
Q99650-EGFRvIII	Q63HM1	OSMR/EGFRvIII	AFMID	high conf	y	n	n	n	n	interacts with OSMR/EGFRvIII, not with OSMR
Q99650-EGFRvIII	P31751	OSMR/EGFRvIII	AKT2	high conf	y	n	n	n	n	interacts with OSMR/EGFRvIII, not with OSMR
Q99650-EGFRvIII	P58335	OSMR/EGFRvIII	ANTXR2	high conf	y	n	n	n	n	interacts with OSMR/EGFRvIII, not with OSMR
Q99650-EGFRvIII	Q7Z5R6	OSMR/EGFRvIII	APBB1IP	high conf	y	n	n	n	n	interacts with OSMR/EGFRvIII, not with OSMR
Q99650-EGFRvIII	Q96GD4	OSMR/EGFRvIII	AURKB	high conf	y	n	n	n	n	interacts with OSMR/EGFRvIII, not with OSMR
Q99650-EGFRvIII	O43825	OSMR/EGFRvIII	B3GALT2	high conf	y	n	n	n	n	interacts with OSMR/EGFRvIII, not with OSMR
Q99650-EGFRvIII	Q9UL15	OSMR/EGFRvIII	BAG5	high conf	y	n	n	n	n	interacts with OSMR/EGFRvIII, not with OSMR
Q99650-EGFRvIII	O95870	OSMR/EGFRvIII	BAT5	high conf	y	n	n	n	n	interacts with OSMR/EGFRvIII, not with OSMR
Q99650-EGFRvIII	Q8TAM1	OSMR/EGFRvIII	BBS10	high conf	y	n	n	n	n	interacts with OSMR/EGFRvIII, not with OSMR
Q99650-EGFRvIII	P51572	OSMR/EGFRvIII	BCAP31	high conf	y	n	n	n	n	interacts with OSMR and with OSMR/EGFRvIII
Q99650-EGFRvIII	Q07817	OSMR/EGFRvIII	BCL2L1	high conf	y	n	n	n	n	interacts with OSMR/EGFRvIII, not with OSMR
Q99650-EGFRvIII	Q9BZR8	OSMR/EGFRvIII	BCL2L14	high conf	y	n	n	n	n	interacts with OSMR and with OSMR/EGFRvIII
Q99650-EGFRvIII	Q9HAY6	OSMR/EGFRvIII	BCMO1	high conf	y	n	n	n	n	interacts with OSMR/EGFRvIII, not with OSMR
Q99650-EGFRvIII	P02818	OSMR/EGFRvIII	BGLAP	high conf	y	n	n	n	n	interacts with OSMR/EGFRvIII, not with OSMR
Q99650-EGFRvIII	Q96P09	OSMR/EGFRvIII	BIRC8	high conf	y	n	n	n	n	interacts with OSMR/EGFRvIII, not with OSMR
Q99650-EGFRvIII	Q86VG3	OSMR/EGFRvIII	C11orf74	high conf	y	n	n	n	n	interacts with OSMR/EGFRvIII, not with OSMR
Q99650-EGFRvIII	Q99622	OSMR/EGFRvIII	C12orf57	high conf	y	n	n	n	n	interacts with OSMR/EGFRvIII, not with OSMR
Q99650-EGFRvIII	Q3B7S5	OSMR/EGFRvIII	C18orf62	high conf	y	n	n	n	n	interacts with OSMR and with OSMR/EGFRvIII
Q99650-EGFRvIII	P58557	OSMR/EGFRvIII	C21orf57	high conf	y	n	n	n	n	interacts with OSMR/EGFRvIII, not with OSMR
Q99650-EGFRvIII	Q96CB5	OSMR/EGFRvIII	C8orf44	high conf	y	n	n	n	n	interacts with OSMR and with OSMR/EGFRvIII
Q99650-EGFRvIII	Q9NRY2	OSMR/EGFRvIII	C9orf80	high conf	y	n	n	n	n	interacts with OSMR/EGFRvIII, not with OSMR
Q99650-EGFRvIII	Q96NX5	OSMR/EGFRvIII	CAMK1G	high conf	y	n	n	n	n	interacts with OSMR/EGFRvIII, not with OSMR
Q99650-EGFRvIII	O14958	OSMR/EGFRvIII	CASQ2	high conf	y	n	n	n	n	interacts with OSMR/EGFRvIII, not with OSMR
Q99650-EGFRvIII	Q96NT0	OSMR/EGFRvIII	CCDC115	high conf	y	n	n	n	n	interacts with OSMR/EGFRvIII, not with OSMR
Q99650-EGFRvIII	Q9UJ71	OSMR/EGFRvIII	CD207	high conf	y	n	n	n	n	interacts with OSMR/EGFRvIII, not with OSMR
Q99650-EGFRvIII	P11912	OSMR/EGFRvIII	CD79A	high conf	y	n	n	n	n	interacts with OSMR/EGFRvIII, not with OSMR
Q99650-EGFRvIII	Q5T4B2	OSMR/EGFRvIII	CERCAM	high conf	y	n	n	n	n	interacts with OSMR/EGFRvIII, not with OSMR
Q99650-EGFRvIII	P0DN86	OSMR/EGFRvIII	CGB	high conf	y	n	n	n	n	interacts with OSMR/EGFRvIII, not with OSMR
Q99650-EGFRvIII	Q6NT52	OSMR/EGFRvIII	CGB2	high conf	y	n	n	n	n	interacts with OSMR/EGFRvIII, not with OSMR
Q99650-EGFRvIII	Q9BSY4	OSMR/EGFRvIII	CHCHD5	high conf	y	n	n	n	n	interacts with OSMR/EGFRvIII, not with OSMR
Q99650-EGFRvIII	Q92478	OSMR/EGFRvIII	CLEC2B	high conf	y	n	n	n	n	interacts with OSMR and with OSMR/EGFRvIII
Q99650-EGFRvIII	O00299	OSMR/EGFRvIII	CLIC1	high conf	y	n	n	n	n	interacts with OSMR and with OSMR/EGFRvIII
Q99650-EGFRvIII	Q16630	OSMR/EGFRvIII	CPSF6	high conf	y	n	n	n	n	interacts with OSMR/EGFRvIII, not with OSMR
Q99650-EGFRvIII	P43155	OSMR/EGFRvIII	CRAT	high conf	y	n	n	n	n	interacts with OSMR/EGFRvIII, not with OSMR
Q99650-EGFRvIII	O43889	OSMR/EGFRvIII	CREB3	high conf	y	n	n	n	n	interacts with OSMR and with OSMR/EGFRvIII
Q99650-EGFRvIII	Q8N6G5	OSMR/EGFRvIII	CSGALNACT2	high conf	y	n	n	n	n	interacts with OSMR and with OSMR/EGFRvIII
Q99650-EGFRvIII	Q9H114	OSMR/EGFRvIII	CSTL1	high conf	y	n	n	n	n	interacts with OSMR/EGFRvIII, not with OSMR
Q99650-EGFRvIII	O96002	OSMR/EGFRvIII	CXorf1	high conf	y	n	n	n	n	interacts with OSMR and with OSMR/EGFRvIII
Q99650-EGFRvIII	Q96J86	OSMR/EGFRvIII	CYYR1	high conf	y	n	n	n	n	interacts with OSMR/EGFRvIII, not with OSMR
Q99650-EGFRvIII	P07108	OSMR/EGFRvIII	DBI	high conf	y	n	n	n	n	interacts with OSMR/EGFRvIII, not with OSMR
Q99650-EGFRvIII	P07585	OSMR/EGFRvIII	DCN	high conf	y	n	n	n	n	interacts with OSMR and with OSMR/EGFRvIII
Q99650-EGFRvIII	P40126	OSMR/EGFRvIII	DCT	high conf	y	n	n	n	n	interacts with OSMR/EGFRvIII, not with OSMR
Q99650-EGFRvIII	P98153	OSMR/EGFRvIII	DGCR2	high conf	y	n	n	n	n	interacts with OSMR/EGFRvIII, not with OSMR
Q99650-EGFRvIII	Q9UNQ2	OSMR/EGFRvIII	DIMT1L	high conf	y	n	n	n	n	interacts with OSMR/EGFRvIII, not with OSMR
Q99650-EGFRvIII	Q9NVM6	OSMR/EGFRvIII	DNAJC17	high conf	y	n	n	n	n	interacts with OSMR/EGFRvIII, not with OSMR
Q99650-EGFRvIII	Q8WZ79	OSMR/EGFRvIII	DNASE2B	high conf	y	n	n	n	n	interacts with OSMR/EGFRvIII, not with OSMR
Q99650-EGFRvIII	Q9NX74	OSMR/EGFRvIII	DUS2L	high conf	y	n	n	n	n	interacts with OSMR/EGFRvIII, not with OSMR
Q99650-EGFRvIII	Q9BQ95	OSMR/EGFRvIII	ECSIT	high conf	y	n	n	n	n	interacts with OSMR/EGFRvIII, not with OSMR
Q99650-EGFRvIII	Q9H9G7	OSMR/EGFRvIII	EIF2C3	high conf	y	n	n	n	n	interacts with OSMR and with OSMR/EGFRvIII
Q99650-EGFRvIII	O43909	OSMR/EGFRvIII	EXTL3	high conf	y	n	n	n	n	interacts with OSMR/EGFRvIII, not with OSMR
Q99650-EGFRvIII	O95864	OSMR/EGFRvIII	FADS2	high conf	y	n	n	n	n	interacts with OSMR/EGFRvIII, not with OSMR
Q99650-EGFRvIII	Q9C0I3	OSMR/EGFRvIII	FAM190A	high conf	y	n	n	n	n	interacts with OSMR/EGFRvIII, not with OSMR
Q99650-EGFRvIII	Q8NEG0	OSMR/EGFRvIII	FAM71C	high conf	y	n	n	n	n	interacts with OSMR/EGFRvIII, not with OSMR
Q99650-EGFRvIII	Q9UIM3	OSMR/EGFRvIII	FKBPL	high conf	y	n	n	n	n	interacts with OSMR/EGFRvIII, not with OSMR
Q99650-EGFRvIII	Q70Z53	OSMR/EGFRvIII	FRA10AC1	high conf	y	n	n	n	n	interacts with OSMR/EGFRvIII, not with OSMR
Q99650-EGFRvIII	P02774	OSMR/EGFRvIII	GC	high conf	y	n	n	n	n	interacts with OSMR and with OSMR/EGFRvIII
Q99650-EGFRvIII	Q9NWZ8	OSMR/EGFRvIII	GEMIN8	high conf	y	n	n	n	n	interacts with OSMR/EGFRvIII, not with OSMR
Q99650-EGFRvIII	P35754	OSMR/EGFRvIII	GLRX	high conf	y	n	n	n	n	interacts with OSMR and with OSMR/EGFRvIII
Q99650-EGFRvIII	P63092	OSMR/EGFRvIII	GNAS	high conf	y	n	n	n	n	interacts with OSMR/EGFRvIII, not with OSMR
Q99650-EGFRvIII	Q86WP2	OSMR/EGFRvIII	GPBP1	high conf	y	n	n	n	n	interacts with OSMR and with OSMR/EGFRvIII
Q99650-EGFRvIII	Q13491	OSMR/EGFRvIII	GPM6B	high conf	y	n	n	n	n	interacts with OSMR/EGFRvIII, not with OSMR
Q99650-EGFRvIII	Q6ZVF9	OSMR/EGFRvIII	GPRIN3	high conf	y	n	n	n	n	interacts with OSMR/EGFRvIII, not with OSMR
Q99650-EGFRvIII	Q9Y2Q3	OSMR/EGFRvIII	GSTK1	high conf	y	n	n	n	n	interacts with OSMR/EGFRvIII, not with OSMR
Q99650-EGFRvIII	P78417	OSMR/EGFRvIII	GSTO1	high conf	y	n	n	n	n	interacts with OSMR/EGFRvIII, not with OSMR
Q99650-EGFRvIII	P0C0S5	OSMR/EGFRvIII	H2AFZ	high conf	y	n	n	n	n	interacts with OSMR/EGFRvIII, not with OSMR
Q99650-EGFRvIII	Q9BT25	OSMR/EGFRvIII	HAUS8	high conf	y	n	n	n	n	interacts with OSMR/EGFRvIII, not with OSMR
Q99650-EGFRvIII	Q9UBX0	OSMR/EGFRvIII	HESX1	high conf	y	n	n	n	n	interacts with OSMR/EGFRvIII, not with OSMR
Q99650-EGFRvIII	P58876	OSMR/EGFRvIII	HIST1H2BD	high conf	y	n	n	n	n	interacts with OSMR/EGFRvIII, not with OSMR
Q99650-EGFRvIII	P68431	OSMR/EGFRvIII	HIST1H3F	high conf	y	n	n	n	n	interacts with OSMR/EGFRvIII, not with OSMR
Q99650-EGFRvIII	Q9BUP3	OSMR/EGFRvIII	HTATIP2	high conf	y	n	n	n	n	interacts with OSMR/EGFRvIII, not with OSMR
Q99650-EGFRvIII	P01861	OSMR/EGFRvIII	IGHG4	high conf	y	n	n	n	n	interacts with OSMR/EGFRvIII, not with OSMR
Q99650-EGFRvIII	Q96T52	OSMR/EGFRvIII	IMMP2L	high conf	y	n	n	n	n	interacts with OSMR and with OSMR/EGFRvIII
Q99650-EGFRvIII	Q8IYV9	OSMR/EGFRvIII	IZUMO1	high conf	y	n	n	n	n	interacts with OSMR/EGFRvIII, not with OSMR
Q99650-EGFRvIII	P48051	OSMR/EGFRvIII	KCNJ6	high conf	y	n	n	n	n	interacts with OSMR/EGFRvIII, not with OSMR
Q99650-EGFRvIII	Q9ULS6	OSMR/EGFRvIII	KCNS2	high conf	y	n	n	n	n	interacts with OSMR/EGFRvIII, not with OSMR
Q99650-EGFRvIII	O94889	OSMR/EGFRvIII	KLHL18	high conf	y	n	n	n	n	interacts with OSMR/EGFRvIII, not with OSMR
Q99650-EGFRvIII	Q92876	OSMR/EGFRvIII	KLK6	high conf	y	n	n	n	n	interacts with OSMR/EGFRvIII, not with OSMR
Q99650-EGFRvIII	Q9BYR6	OSMR/EGFRvIII	KRTAP3-3	high conf	y	n	n	n	n	interacts with OSMR/EGFRvIII, not with OSMR
Q99650-EGFRvIII	O95214	OSMR/EGFRvIII	LEPROTL1	high conf	y	n	n	n	n	interacts with OSMR/EGFRvIII, not with OSMR
Q99650-EGFRvIII	Q7Z7J7	OSMR/EGFRvIII	LHFPL4	high conf	y	n	n	n	n	interacts with OSMR/EGFRvIII, not with OSMR
Q99650-EGFRvIII	P43657	OSMR/EGFRvIII	LPAR6	high conf	y	n	n	n	n	interacts with OSMR/EGFRvIII, not with OSMR
Q99650-EGFRvIII	Q8NF37	OSMR/EGFRvIII	LPCAT1	high conf	y	n	n	n	n	interacts with OSMR/EGFRvIII, not with OSMR
Q99650-EGFRvIII	Q8N9N7	OSMR/EGFRvIII	LRRC57	high conf	y	n	n	n	n	interacts with OSMR/EGFRvIII, not with OSMR
Q99650-EGFRvIII	Q96JM4	OSMR/EGFRvIII	LRRIQ1	high conf	y	n	n	n	n	interacts with OSMR and with OSMR/EGFRvIII
Q99650-EGFRvIII	P27816	OSMR/EGFRvIII	MAP4	high conf	y	n	n	n	n	interacts with OSMR and with OSMR/EGFRvIII
Q99650-EGFRvIII	P53779	OSMR/EGFRvIII	MAPK10	high conf	y	n	n	n	n	interacts with OSMR/EGFRvIII, not with OSMR
Q99650-EGFRvIII	Q9UEW3	OSMR/EGFRvIII	MARCO	high conf	y	n	n	n	n	interacts with OSMR/EGFRvIII, not with OSMR
Q99650-EGFRvIII	O60291	OSMR/EGFRvIII	MGRN1	high conf	y	n	n	n	n	interacts with OSMR/EGFRvIII, not with OSMR
Q99650-EGFRvIII	P08254	OSMR/EGFRvIII	MMP3	high conf	y	n	n	n	n	interacts with OSMR/EGFRvIII, not with OSMR
Q99650-EGFRvIII	Q9Y6X9	OSMR/EGFRvIII	MORC2	high conf	y	n	n	n	n	interacts with OSMR/EGFRvIII, not with OSMR
Q99650-EGFRvIII	O14807	OSMR/EGFRvIII	MRAS	high conf	y	n	n	n	n	interacts with OSMR/EGFRvIII, not with OSMR
Q99650-EGFRvIII	Q92552	OSMR/EGFRvIII	MRPS27	high conf	y	n	n	n	n	interacts with OSMR/EGFRvIII, not with OSMR
Q99650-EGFRvIII	P21757	OSMR/EGFRvIII	MSR1	high conf	y	n	n	n	n	interacts with OSMR/EGFRvIII, not with OSMR
Q99650-EGFRvIII	Q9H0A0	OSMR/EGFRvIII	NAT10	high conf	y	n	n	n	n	interacts with OSMR/EGFRvIII, not with OSMR
Q99650-EGFRvIII	Q9UHE5	OSMR/EGFRvIII	NAT8	high conf	y	n	n	n	n	interacts with OSMR and with OSMR/EGFRvIII
Q99650-EGFRvIII	Q9Y375	OSMR/EGFRvIII	NDUFAF1	high conf	y	n	n	n	n	interacts with OSMR/EGFRvIII, not with OSMR
Q99650-EGFRvIII	Q16621	OSMR/EGFRvIII	NFE2	high conf	y	n	n	n	n	interacts with OSMR/EGFRvIII, not with OSMR
Q99650-EGFRvIII	P04150	OSMR/EGFRvIII	NR3C1	high conf	y	n	n	n	n	interacts with OSMR/EGFRvIII, not with OSMR
Q99650-EGFRvIII	Q8IXM6	OSMR/EGFRvIII	NRM	high conf	y	n	n	n	n	interacts with OSMR and with OSMR/EGFRvIII
Q99650-EGFRvIII	Q8NG76	OSMR/EGFRvIII	OR2T33	high conf	y	n	n	n	n	interacts with OSMR/EGFRvIII, not with OSMR
Q99650-EGFRvIII	Q9NWU1	OSMR/EGFRvIII	OXSM	high conf	y	n	n	n	n	interacts with OSMR/EGFRvIII, not with OSMR
Q99650-EGFRvIII	Q96AQ6	OSMR/EGFRvIII	PBXIP1	high conf	y	n	n	n	n	interacts with OSMR/EGFRvIII, not with OSMR
Q99650-EGFRvIII	Q9Y5Y5	OSMR/EGFRvIII	PEX16	high conf	y	n	n	n	n	interacts with OSMR/EGFRvIII, not with OSMR
Q99650-EGFRvIII	Q9UHJ9	OSMR/EGFRvIII	PGAP2	high conf	y	n	n	n	n	interacts with OSMR/EGFRvIII, not with OSMR
Q99650-EGFRvIII	Q92643	OSMR/EGFRvIII	PIGK	high conf	y	n	n	n	n	interacts with OSMR and with OSMR/EGFRvIII
Q99650-EGFRvIII	Q99697	OSMR/EGFRvIII	PITX2	high conf	y	n	n	n	n	interacts with OSMR/EGFRvIII, not with OSMR
Q99650-EGFRvIII	P00750	OSMR/EGFRvIII	PLAT	high conf	y	n	n	n	n	interacts with OSMR/EGFRvIII, not with OSMR
Q99650-EGFRvIII	Q6P1K2	OSMR/EGFRvIII	PMF1	high conf	y	n	n	n	n	interacts with OSMR/EGFRvIII, not with OSMR
Q99650-EGFRvIII	Q9UNA4	OSMR/EGFRvIII	POLI	high conf	y	n	n	n	n	interacts with OSMR/EGFRvIII, not with OSMR
Q99650-EGFRvIII	O43422	OSMR/EGFRvIII	PRKRIR	high conf	y	n	n	n	n	interacts with OSMR/EGFRvIII, not with OSMR
Q99650-EGFRvIII	Q8NDX1	OSMR/EGFRvIII	PSD4	high conf	y	n	n	n	n	interacts with OSMR/EGFRvIII, not with OSMR
Q99650-EGFRvIII	P49768	OSMR/EGFRvIII	PSEN1	high conf	y	n	n	n	n	interacts with OSMR/EGFRvIII, not with OSMR
Q99650-EGFRvIII	Q9UIG5	OSMR/EGFRvIII	PSORS1C1	high conf	y	n	n	n	n	interacts with OSMR and with OSMR/EGFRvIII
Q99650-EGFRvIII	P48651	OSMR/EGFRvIII	PTDSS1	high conf	y	n	n	n	n	interacts with OSMR and with OSMR/EGFRvIII
Q99650-EGFRvIII	Q96C36	OSMR/EGFRvIII	PYCR2	high conf	y	n	n	n	n	interacts with OSMR/EGFRvIII, not with OSMR
Q99650-EGFRvIII	P11216	OSMR/EGFRvIII	PYGB	high conf	y	n	n	n	n	interacts with OSMR/EGFRvIII, not with OSMR
Q99650-EGFRvIII	Q9H0U4	OSMR/EGFRvIII	RAB1B	high conf	y	n	n	n	n	interacts with OSMR and with OSMR/EGFRvIII
Q99650-EGFRvIII	Q9UBK7	OSMR/EGFRvIII	RABL2A	high conf	y	n	n	n	n	interacts with OSMR/EGFRvIII, not with OSMR
Q99650-EGFRvIII	Q9UNT1	OSMR/EGFRvIII	RABL2B	high conf	y	n	n	n	n	interacts with OSMR/EGFRvIII, not with OSMR
Q99650-EGFRvIII	Q96NR8	OSMR/EGFRvIII	RDH12	high conf	y	n	n	n	n	interacts with OSMR/EGFRvIII, not with OSMR
Q99650-EGFRvIII	O14921	OSMR/EGFRvIII	RGS13	high conf	y	n	n	n	n	interacts with OSMR/EGFRvIII, not with OSMR
Q99650-EGFRvIII	Q8TEB9	OSMR/EGFRvIII	RHBDD1	high conf	y	n	n	n	n	interacts with OSMR/EGFRvIII, not with OSMR
Q99650-EGFRvIII	Q9H871	OSMR/EGFRvIII	RMND5A	high conf	y	n	n	n	n	interacts with OSMR/EGFRvIII, not with OSMR
Q99650-EGFRvIII	O75830	OSMR/EGFRvIII	SERPINI2	high conf	y	n	n	n	n	interacts with OSMR/EGFRvIII, not with OSMR
Q99650-EGFRvIII	Q8WTS6	OSMR/EGFRvIII	SETD7	high conf	y	n	n	n	n	interacts with OSMR and with OSMR/EGFRvIII
Q99650-EGFRvIII	P04278	OSMR/EGFRvIII	SHBG	high conf	y	n	n	n	n	interacts with OSMR/EGFRvIII, not with OSMR
Q99650-EGFRvIII	P12236	OSMR/EGFRvIII	SLC25A6	high conf	y	n	n	n	n	interacts with OSMR/EGFRvIII, not with OSMR
Q99650-EGFRvIII	Q9H1N7	OSMR/EGFRvIII	SLC35B3	high conf	y	n	n	n	n	interacts with OSMR and with OSMR/EGFRvIII
Q99650-EGFRvIII	Q8N695	OSMR/EGFRvIII	SLC5A8	high conf	y	n	n	n	n	interacts with OSMR/EGFRvIII, not with OSMR
Q99650-EGFRvIII	Q9P0W8	OSMR/EGFRvIII	SPATA7	high conf	y	n	n	n	n	interacts with OSMR/EGFRvIII, not with OSMR
Q99650-EGFRvIII	Q7Z6B7	OSMR/EGFRvIII	SRGAP1	high conf	y	n	n	n	n	interacts with OSMR/EGFRvIII, not with OSMR
Q99650-EGFRvIII	Q11206	OSMR/EGFRvIII	ST3GAL4	high conf	y	n	n	n	n	interacts with OSMR and with OSMR/EGFRvIII
Q99650-EGFRvIII	Q7RTN6	OSMR/EGFRvIII	STRADA	high conf	y	n	n	n	n	interacts with OSMR/EGFRvIII, not with OSMR
Q99650-EGFRvIII	Q8N4V2	OSMR/EGFRvIII	SVOP	high conf	y	n	n	n	n	interacts with OSMR/EGFRvIII, not with OSMR
Q99650-EGFRvIII	Q92844	OSMR/EGFRvIII	TANK	high conf	y	n	n	n	n	interacts with OSMR and with OSMR/EGFRvIII
Q99650-EGFRvIII	P20062	OSMR/EGFRvIII	TCN2	high conf	y	n	n	n	n	interacts with OSMR/EGFRvIII, not with OSMR
Q99650-EGFRvIII	P13385	OSMR/EGFRvIII	TDGF1	high conf	y	n	n	n	n	interacts with OSMR/EGFRvIII, not with OSMR
Q99650-EGFRvIII	Q96FV9	OSMR/EGFRvIII	THOC1	high conf	y	n	n	n	n	interacts with OSMR/EGFRvIII, not with OSMR
Q99650-EGFRvIII	Q17RP2	OSMR/EGFRvIII	TIGD6	high conf	y	n	n	n	n	interacts with OSMR/EGFRvIII, not with OSMR
Q99650-EGFRvIII	Q8WUU8	OSMR/EGFRvIII	TMEM174	high conf	y	n	n	n	n	interacts with OSMR/EGFRvIII, not with OSMR
Q99650-EGFRvIII	Q6ICI0	OSMR/EGFRvIII	TMEM211	high conf	y	n	n	n	n	interacts with OSMR/EGFRvIII, not with OSMR
Q99650-EGFRvIII	Q8IU80	OSMR/EGFRvIII	TMPRSS6	high conf	y	n	n	n	n	interacts with OSMR and with OSMR/EGFRvIII
Q99650-EGFRvIII	O14545	OSMR/EGFRvIII	TRAFD1	high conf	y	n	n	n	n	interacts with OSMR/EGFRvIII, not with OSMR
Q99650-EGFRvIII	Q86SZ2	OSMR/EGFRvIII	TRAPPC6B	high conf	y	n	n	n	n	interacts with OSMR/EGFRvIII, not with OSMR
Q99650-EGFRvIII	O95045	OSMR/EGFRvIII	UPP2	high conf	y	n	n	n	n	interacts with OSMR/EGFRvIII, not with OSMR
Q99650-EGFRvIII	Q08AM6	OSMR/EGFRvIII	VAC14	high conf	y	n	n	n	n	interacts with OSMR/EGFRvIII, not with OSMR
Q99650-EGFRvIII	Q8N1V2	OSMR/EGFRvIII	WDR16	high conf	y	n	n	n	n	interacts with OSMR/EGFRvIII, not with OSMR
Q99650-EGFRvIII	P09544	OSMR/EGFRvIII	WNT2	high conf	y	n	n	n	n	interacts with OSMR/EGFRvIII, not with OSMR
Q99650-EGFRvIII	Q9NQZ6	OSMR/EGFRvIII	ZC4H2	high conf	y	n	n	n	n	interacts with OSMR/EGFRvIII, not with OSMR
Q99650-EGFRvIII	Q9Y397	OSMR/EGFRvIII	ZDHHC9	high conf	y	n	n	n	n	interacts with OSMR/EGFRvIII, not with OSMR
Q99650-EGFRvIII	Q6FIF0	OSMR/EGFRvIII	ZFAND6	high conf	y	n	n	n	n	interacts with OSMR/EGFRvIII, not with OSMR
Q99650-EGFRvIII	Q9Y2P7	OSMR/EGFRvIII	ZNF256	high conf	y	n	n	n	n	interacts with OSMR/EGFRvIII, not with OSMR
Q99650-EGFRvIII	Q8IZ26	OSMR/EGFRvIII	ZNF34	high conf	y	n	n	n	n	interacts with OSMR/EGFRvIII, not with OSMR
Q99650-EGFRvIII	Q9GZX5	OSMR/EGFRvIII	ZNF350	high conf	y	n	n	n	n	interacts with OSMR/EGFRvIII, not with OSMR
Q99650-EGFRvIII	Q5VIY5	OSMR/EGFRvIII	ZNF468	high conf	y	n	n	n	n	interacts with OSMR/EGFRvIII, not with OSMR
Q99650-EGFRvIII	P60852	OSMR/EGFRvIII	ZP1	high conf	y	n	n	n	n	interacts with OSMR and with OSMR/EGFRvIII
Q99650-EGFRvIII	Q96AP4	OSMR/EGFRvIII	ZUFSP	high conf	y	n	n	n	n	interacts with OSMR/EGFRvIII, not with OSMR
A4D1E9	Q7Z6G3	GTPBP10	NECAB2	NA	n	y	y	n	n	interacts with OSMR, not with OSMR/EGFRvIII
O43889	Q13021	CREB3	MALL	NA	n	y	y	n	n	interacts with OSMR, not with OSMR/EGFRvIII
P33993	Q9Y2Q3	MCM7	GSTK1	NA	n	y	y	n	n	interacts with OSMR/EGFRvIII, not with OSMR
Q70Z53	Q9UBQ0	FRA10AC1	VPS29	NA	n	y	y	n	n	interacts with OSMR, not with OSMR/EGFRvIII
P27707	Q9UMR2	DCK	DDX19B	NA	n	y	y	n	n	interacts with OSMR, not with OSMR/EGFRvIII
P13385	Q7L5N1	TDGF1	COPS6	NA	n	y	y	n	n	interacts with OSMR, not with OSMR/EGFRvIII
Q6P1K2	Q7L5N1	PMF1	COPS6	NA	n	y	y	y	n	interacts with OSMR, not with OSMR/EGFRvIII
Q07817	Q9BZR8	BCL2L1	BCL2L14	NA	n	y	y	n	n	interacts with OSMR and with OSMR/EGFRvIII
P51572	Q07817	BCAP31	BCL2L1	NA	n	y	y	y	n	interacts with OSMR/EGFRvIII, not with OSMR
P49768	Q07817	PSEN1	BCL2L1	NA	n	y	y	y	n	interacts with OSMR/EGFRvIII, not with OSMR
P49768	Q15011	PSEN1	HERPUD1	NA	n	y	y	y	n	interacts with OSMR, not with OSMR/EGFRvIII
O94889	Q7L5N1	KLHL18	COPS6	NA	n	y	y	n	n	interacts with OSMR, not with OSMR/EGFRvIII
P68431	Q8WTS6	HIST1H3C	SETD7	NA	n	y	y	y	n	interacts with OSMR and with OSMR/EGFRvIII
P68431	Q96GD4	HIST1H3C	AURKB	NA	n	y	y	n	n	interacts with OSMR/EGFRvIII, not with OSMR
P36873	Q07817	PPP1CC	BCL2L1	NA	n	y	y	y	y	interacts with OSMR/EGFRvIII, not with OSMR
P51572	Q9Y3D6	BCAP31	FIS1	NA	n	y	y	y	n	interacts with OSMR, not with OSMR/EGFRvIII
P49768	Q9BQ95	PSEN1	ECSIT	NA	n	y	y	n	n	interacts with OSMR/EGFRvIII, not with OSMR
O75436	Q9UBQ0	VPS26A	VPS29	NA	n	y	y	y	y	interacts with OSMR, not with OSMR/EGFRvIII
O75436	Q15819	VPS26A	UBE2V2	NA	n	y	y	n	n	interacts with OSMR, not with OSMR/EGFRvIII
Q9BQ95	Q9Y375	ECSIT	NDUFAF1	NA	n	y	y	y	y	interacts with OSMR/EGFRvIII, not with OSMR
P0C0S5	P68431	H2AFZ	HIST1H3C	NA	n	y	y	y	n	interacts with OSMR, not with OSMR/EGFRvIII
Q13491	Q9UBY8	GPM6B	CLN8	NA	n	y	y	n	n	interacts with OSMR, not with OSMR/EGFRvIII
P60201	Q9UBY8	PLP1	CLN8	NA	n	y	y	n	n	interacts with OSMR, not with OSMR/EGFRvIII
Q96AP4	Q9UBY8	ZUFSP	CLN8	NA	n	y	y	n	n	interacts with OSMR, not with OSMR/EGFRvIII
P36873	Q86VG3	PPP1CC	C11orf74	NA	n	y	y	n	n	interacts with OSMR/EGFRvIII, not with OSMR
Q70Z53	Q96FV9	FRA10AC1	THOC1	NA	n	y	y	n	y	interacts with OSMR/EGFRvIII, not with OSMR
Q96GD4	Q9BZD4	AURKB	NUF2	NA	n	y	y	y	n	interacts with OSMR, not with OSMR/EGFRvIII
P31751	Q15363	AKT2	TMED2	NA	n	y	y	n	n	interacts with OSMR, not with OSMR/EGFRvIII
O95361	P33993	TRIM16	MCM7	NA	n	y	y	n	y	interacts with OSMR, not with OSMR/EGFRvIII
P41227	Q9UBQ0	NAA10	VPS29	NA	n	y	y	n	n	interacts with OSMR, not with OSMR/EGFRvIII
O75436	P41227	VPS26A	NAA10	NA	n	y	y	n	n	interacts with OSMR, not with OSMR/EGFRvIII
Q92552	Q96GD4	MRPS27	AURKB	NA	n	y	y	n	n	interacts with OSMR/EGFRvIII, not with OSMR
P24863	Q96AQ6	CCNC	PBXIP1	NA	n	y	y	n	n	interacts with OSMR/EGFRvIII, not with OSMR
P21757	Q13021	MSR1	MALL	NA	n	y	y	n	n	interacts with OSMR, not with OSMR/EGFRvIII
O95214	P21757	LEPROTL1	MSR1	NA	n	y	y	n	n	interacts with OSMR/EGFRvIII, not with OSMR
Q7Z6G3	Q92552	NECAB2	MRPS27	NA	n	y	y	n	y	interacts with OSMR/EGFRvIII, not with OSMR
Q08AM6	Q8IZ26	VAC14	ZNF34	NA	n	y	y	n	n	interacts with OSMR/EGFRvIII, not with OSMR
P31751	P68431	AKT2	HIST1H3C	NA	n	y	y	n	n	interacts with OSMR, not with OSMR/EGFRvIII
Q53R12	Q8N0U8	TM4SF20	VKORC1L1	NA	n	y	y	n	n	interacts with OSMR, not with OSMR/EGFRvIII
Q6UXL0	Q9Y397	IL20RB	ZDHHC9	NA	n	y	y	n	n	interacts with OSMR/EGFRvIII, not with OSMR
P36873	Q6P1K2	PPP1CC	PMF1	NA	n	y	y	n	n	interacts with OSMR/EGFRvIII, not with OSMR
P13385	Q9H871	TDGF1	RMND5A	NA	n	y	y	n	n	interacts with OSMR/EGFRvIII, not with OSMR
P13385	Q96E35	TDGF1	ZMYND19	NA	n	y	y	n	n	interacts with OSMR, not with OSMR/EGFRvIII
P36873	Q9BZD4	PPP1CC	NUF2	NA	n	y	y	y	n	interacts with OSMR, not with OSMR/EGFRvIII
Q86SZ2	Q9BZR8	TRAPPC6B	BCL2L14	NA	n	y	y	n	n	interacts with OSMR and with OSMR/EGFRvIII
Q11206	Q8N6G5	ST3GAL4	CSGALNACT2	NA	n	y	y	n	n	interacts with OSMR and with OSMR/EGFRvIII
Q11206	Q9BRX8	ST3GAL4	C10orf58	NA	n	y	y	n	n	interacts with OSMR, not with OSMR/EGFRvIII
P00750	P07585	PLAT	DCN	NA	n	y	y	n	n	interacts with OSMR and with OSMR/EGFRvIII
O95361	Q309B1	TRIM16	TRIM16L	NA	n	y	y	n	n	interacts with OSMR, not with OSMR/EGFRvIII
P48594	Q9UMR2	SERPINB4	DDX19B	NA	n	y	y	n	n	interacts with OSMR, not with OSMR/EGFRvIII
Q5T4B2	Q8WZ79	CERCAM	DNASE2B	NA	n	y	y	n	n	interacts with OSMR/EGFRvIII, not with OSMR
P33993	Q9UBQ0	MCM7	VPS29	NA	n	y	y	n	n	interacts with OSMR, not with OSMR/EGFRvIII
O75436	P33993	VPS26A	MCM7	NA	n	y	y	n	n	interacts with OSMR, not with OSMR/EGFRvIII
P58557	P63092	C21orf57	GNAS	NA	n	y	y	n	n	interacts with OSMR/EGFRvIII, not with OSMR
Q96E35	Q9H871	ZMYND19	RMND5A	NA	n	y	y	n	n	interacts with OSMR/EGFRvIII, not with OSMR
O00299	Q70Z53	CLIC1	FRA10AC1	NA	n	y	y	n	n	interacts with OSMR/EGFRvIII, not with OSMR
P35754	Q86X76	GLRX	NIT1	NA	n	y	y	n	n	interacts with OSMR, not with OSMR/EGFRvIII
Q15363	Q9H0U4	TMED2	RAB1B	NA	n	y	y	y	n	interacts with OSMR and with OSMR/EGFRvIII
P04150	Q7L5N1	NR3C1	COPS6	NA	n	y	y	n	n	interacts with OSMR, not with OSMR/EGFRvIII
O43889	Q9Y3D6	CREB3	FIS1	NA	n	y	y	n	n	interacts with OSMR, not with OSMR/EGFRvIII
O43889	Q07817	CREB3	BCL2L1	NA	n	y	y	n	n	interacts with OSMR/EGFRvIII, not with OSMR
O43889	O95870	CREB3	BAT5	NA	n	y	y	n	n	interacts with OSMR/EGFRvIII, not with OSMR
O43889	P41227	CREB3	NAA10	NA	n	y	y	n	n	interacts with OSMR, not with OSMR/EGFRvIII
O14494	O43889	PPAP2A	CREB3	NA	n	y	y	n	n	interacts with OSMR and with OSMR/EGFRvIII
O43889	P48651	CREB3	PTDSS1	NA	n	y	y	n	n	interacts with OSMR and with OSMR/EGFRvIII
P33993	P68431	MCM7	HIST1H3C	NA	n	y	y	y	n	interacts with OSMR, not with OSMR/EGFRvIII
P61254	P68431	RPL26	HIST1H3C	NA	n	y	y	n	n	interacts with OSMR, not with OSMR/EGFRvIII
Q9P289	Q9Y375	MST4	NDUFAF1	NA	n	y	y	n	n	interacts with OSMR/EGFRvIII, not with OSMR
O00299	P36873	CLIC1	PPP1CC	NA	n	y	y	n	n	interacts with OSMR, not with OSMR/EGFRvIII
Q15819	Q17RP2	UBE2V2	TIGD6	NA	n	y	y	n	n	interacts with OSMR/EGFRvIII, not with OSMR
Q9H9G7	Q9UL15	EIF2C3	BAG5	NA	n	y	y	n	n	interacts with OSMR/EGFRvIII, not with OSMR
O75436	Q16630	VPS26A	CPSF6	NA	n	y	y	n	n	interacts with OSMR/EGFRvIII, not with OSMR
Q6P1K2	Q9BZD4	PMF1	NUF2	NA	n	y	y	y	n	interacts with OSMR, not with OSMR/EGFRvIII
Q92844	Q96AQ6	TANK	PBXIP1	NA	n	y	y	n	n	interacts with OSMR/EGFRvIII, not with OSMR
O43889	Q9UJ71	CREB3	CD207	NA	n	y	y	n	n	interacts with OSMR/EGFRvIII, not with OSMR
O43889	P17302	CREB3	GJA1	NA	n	y	y	n	n	interacts with OSMR, not with OSMR/EGFRvIII
O43889	P60201	CREB3	PLP1	NA	n	y	y	n	n	interacts with OSMR, not with OSMR/EGFRvIII
O43889	P11686	CREB3	SFTPC	NA	n	y	y	n	n	interacts with OSMR, not with OSMR/EGFRvIII
O43889	Q9Y397	CREB3	ZDHHC9	NA	n	y	y	n	n	interacts with OSMR/EGFRvIII, not with OSMR
Q6P1K2	Q9NQZ6	PMF1	ZC4H2	NA	n	y	y	n	n	interacts with OSMR/EGFRvIII, not with OSMR
Q04771	Q96JM4	ACVR1	LRRIQ1	NA	n	y	y	n	n	interacts with OSMR and with OSMR/EGFRvIII
Q96E35	Q9Y2Y8	ZMYND19	PRG3	NA	n	y	y	n	n	interacts with OSMR, not with OSMR/EGFRvIII
P00750	P05155	PLAT	SERPING1	NA	n	y	y	y	n	interacts with OSMR, not with OSMR/EGFRvIII
Q6PIW4	Q9UBK7	FIGNL1	RABL2A	NA	n	y	y	n	n	interacts with OSMR/EGFRvIII, not with OSMR
Q9H871	Q9Y2Y8	RMND5A	PRG3	NA	n	y	y	n	n	interacts with OSMR, not with OSMR/EGFRvIII
Q8N6G5	Q8N9N7	CSGALNACT2	LRRC57	NA	n	y	y	n	n	interacts with OSMR/EGFRvIII, not with OSMR
Q8IYV9	Q92604	IZUMO1	LPGAT1	NA	n	y	y	n	n	interacts with OSMR, not with OSMR/EGFRvIII
P55197	Q6P1K2	MLLT10	PMF1	NA	n	y	y	n	n	interacts with OSMR/EGFRvIII, not with OSMR
Q8N6G5	Q9BRX8	CSGALNACT2	C10orf58	NA	n	y	y	n	n	interacts with OSMR, not with OSMR/EGFRvIII
O95831	Q6JQN1	AIFM1	ACAD10	NA	n	y	y	n	n	interacts with OSMR, not with OSMR/EGFRvIII
P15907	Q96RU2	ST6GAL1	USP28	NA	n	y	y	n	n	interacts with OSMR, not with OSMR/EGFRvIII
P11912	Q9Y5Y5	CD79A	PEX16	NA	n	y	y	n	n	interacts with OSMR/EGFRvIII, not with OSMR
P55084	P58557	HADHB	C21orf57	NA	n	y	y	n	n	interacts with OSMR/EGFRvIII, not with OSMR
P58557	Q6JQN1	C21orf57	ACAD10	NA	n	y	y	n	n	interacts with OSMR, not with OSMR/EGFRvIII
P11912	Q9UMR2	CD79A	DDX19B	NA	n	y	y	n	n	interacts with OSMR, not with OSMR/EGFRvIII
Q9BZD4	Q9HCH0	NUF2	NCKAP5L	NA	n	y	y	n	n	interacts with OSMR, not with OSMR/EGFRvIII
O95361	P05162	TRIM16	LGALS2	NA	n	y	y	n	n	interacts with OSMR, not with OSMR/EGFRvIII
P33993	Q9BXW9	MCM7	FANCD2	NA	n	y	y	n	y	interacts with OSMR, not with OSMR/EGFRvIII
P68431	Q9BXW9	HIST1H3C	FANCD2	NA	n	y	y	n	n	interacts with OSMR, not with OSMR/EGFRvIII
Q86YM7	Q96AP4	HOMER1	ZUFSP	NA	n	y	y	n	n	interacts with OSMR/EGFRvIII, not with OSMR
P04150	P68431	NR3C1	HIST1H3C	NA	n	y	y	n	n	interacts with OSMR, not with OSMR/EGFRvIII
P33993	Q9H871	MCM7	RMND5A	NA	n	y	y	n	n	interacts with OSMR/EGFRvIII, not with OSMR
Q9H871	Q9UL15	RMND5A	BAG5	NA	n	y	y	n	n	interacts with OSMR/EGFRvIII, not with OSMR
P13385	Q04771	TDGF1	ACVR1	NA	n	y	y	n	n	interacts with OSMR, not with OSMR/EGFRvIII
P63092	Q07817	GNAS	BCL2L1	NA	n	y	y	n	n	interacts with OSMR/EGFRvIII, not with OSMR
P61254	Q9UNQ2	RPL26	DIMT1L	NA	n	y	y	n	n	interacts with OSMR/EGFRvIII, not with OSMR
Q07817	Q08AM6	BCL2L1	VAC14	NA	n	y	y	n	n	interacts with OSMR/EGFRvIII, not with OSMR
P81605	Q96AP4	DCD	ZUFSP	NA	n	y	y	n	n	interacts with OSMR/EGFRvIII, not with OSMR
O95831	Q96C36	AIFM1	PYCR2	NA	n	y	y	n	n	interacts with OSMR/EGFRvIII, not with OSMR
P68431	Q9Y6X9	HIST1H3C	MORC2	NA	n	y	y	n	n	interacts with OSMR/EGFRvIII, not with OSMR
Q96GD4	Q9H0A0	AURKB	NAT10	NA	n	y	y	n	n	interacts with OSMR/EGFRvIII, not with OSMR
P68431	Q92552	HIST1H3C	MRPS27	NA	n	y	y	n	n	interacts with OSMR/EGFRvIII, not with OSMR
P68431	Q9H0A0	HIST1H3C	NAT10	NA	n	y	y	n	n	interacts with OSMR/EGFRvIII, not with OSMR
P68431	Q92979	HIST1H3C	EMG1	NA	n	y	y	n	n	interacts with OSMR, not with OSMR/EGFRvIII
P68431	Q9NUQ6	HIST1H3C	SPATS2L	NA	n	y	y	n	n	interacts with OSMR, not with OSMR/EGFRvIII
P68431	Q9NVM6	HIST1H3C	DNAJC17	NA	n	y	y	n	n	interacts with OSMR/EGFRvIII, not with OSMR
P01602	Q9HCE5	IGKV1-5	METTL14	NA	n	y	y	n	n	interacts with OSMR, not with OSMR/EGFRvIII
P81605	Q9HCE5	DCD	METTL14	NA	n	y	y	n	n	interacts with OSMR, not with OSMR/EGFRvIII
P0C0S5	Q9HCE5	H2AFZ	METTL14	NA	n	y	y	n	n	interacts with OSMR, not with OSMR/EGFRvIII
P12236	Q9HCE5	SLC25A6	METTL14	NA	n	y	y	n	n	interacts with OSMR, not with OSMR/EGFRvIII
P51572	Q9HCE5	BCAP31	METTL14	NA	n	y	y	n	n	interacts with OSMR, not with OSMR/EGFRvIII
Q16630	Q9HCE5	CPSF6	METTL14	NA	n	y	y	n	n	interacts with OSMR, not with OSMR/EGFRvIII
P48594	Q92844	SERPINB4	TANK	NA	n	y	y	n	n	interacts with OSMR and with OSMR/EGFRvIII
P21580	Q92844	TNFAIP3	TANK	NA	n	y	y	y	n	interacts with OSMR and with OSMR/EGFRvIII
P36873	Q6UWZ7	PPP1CC	FAM175A	NA	n	y	y	n	n	interacts with OSMR, not with OSMR/EGFRvIII
P36873	P61254	PPP1CC	RPL26	NA	n	y	y	n	n	interacts with OSMR, not with OSMR/EGFRvIII
P36873	Q99622	PPP1CC	C12orf57	NA	n	y	y	n	n	interacts with OSMR/EGFRvIII, not with OSMR
P29274	Q7Z6G3	ADORA2A	NECAB2	NA	n	y	y	y	y	interacts with OSMR, not with OSMR/EGFRvIII
O95831	Q9BZR8	AIFM1	BCL2L14	NA	n	y	y	n	n	interacts with OSMR and with OSMR/EGFRvIII
P33993	Q9BZR8	MCM7	BCL2L14	NA	n	y	y	n	n	interacts with OSMR and with OSMR/EGFRvIII
Q96C36	Q9BZR8	PYCR2	BCL2L14	NA	n	y	y	n	n	interacts with OSMR and with OSMR/EGFRvIII
P51572	Q8TEB9	BCAP31	RHBDD1	NA	n	y	y	n	n	interacts with OSMR/EGFRvIII, not with OSMR
P27816	Q8TEB9	MAP4	RHBDD1	NA	n	y	y	n	n	interacts with OSMR/EGFRvIII, not with OSMR
O43889	Q8TBG9	CREB3	SYNPR	NA	n	y	y	n	n	interacts with OSMR, not with OSMR/EGFRvIII
P49768	P51572	PSEN1	BCAP31	NA	n	y	y	y	n	interacts with OSMR and with OSMR/EGFRvIII
O00767	P49768	SCD	PSEN1	NA	n	y	y	n	n	interacts with OSMR/EGFRvIII, not with OSMR
O95864	P49768	FADS2	PSEN1	NA	n	y	y	n	n	interacts with OSMR/EGFRvIII, not with OSMR
P40126	P60201	DCT	PLP1	NA	n	y	y	n	n	interacts with OSMR, not with OSMR/EGFRvIII
P49768	Q3KNW5	PSEN1	SLC10A6	NA	n	y	y	n	n	interacts with OSMR, not with OSMR/EGFRvIII
P11912	Q9H1M4	CD79A	DEFB127	NA	n	y	y	n	n	interacts with OSMR, not with OSMR/EGFRvIII
O95214	Q9NZD8	LEPROTL1	SPG21	NA	n	y	y	n	n	interacts with OSMR, not with OSMR/EGFRvIII
Q8N8X9	Q9NZD8	C1orf161	SPG21	NA	n	y	y	n	n	interacts with OSMR, not with OSMR/EGFRvIII
O00767	Q9UJ71	SCD	CD207	NA	n	y	y	n	n	interacts with OSMR/EGFRvIII, not with OSMR
O00767	Q3KNW5	SCD	SLC10A6	NA	n	y	y	n	n	interacts with OSMR, not with OSMR/EGFRvIII
O00767	P48051	SCD	KCNJ6	NA	n	y	y	n	n	interacts with OSMR/EGFRvIII, not with OSMR
O00767	Q2HXU8	SCD	CLEC12B	NA	n	y	y	n	n	interacts with OSMR, not with OSMR/EGFRvIII
O95214	P11912	LEPROTL1	CD79A	NA	n	y	y	n	n	interacts with OSMR/EGFRvIII, not with OSMR
O95214	Q9Y5Y5	LEPROTL1	PEX16	NA	n	y	y	n	n	interacts with OSMR/EGFRvIII, not with OSMR
O95214	P60201	LEPROTL1	PLP1	NA	n	y	y	n	n	interacts with OSMR, not with OSMR/EGFRvIII
O95214	Q9UHE5	LEPROTL1	NAT8	NA	n	y	y	n	n	interacts with OSMR and with OSMR/EGFRvIII
O95214	Q13021	LEPROTL1	MALL	NA	n	y	y	n	n	interacts with OSMR, not with OSMR/EGFRvIII
O95214	P48051	LEPROTL1	KCNJ6	NA	n	y	y	n	n	interacts with OSMR/EGFRvIII, not with OSMR
P11912	Q9UHE5	CD79A	NAT8	NA	n	y	y	n	n	interacts with OSMR and with OSMR/EGFRvIII
P11912	Q13021	CD79A	MALL	NA	n	y	y	n	n	interacts with OSMR, not with OSMR/EGFRvIII
P11912	Q9UHJ9	CD79A	PGAP2	NA	n	y	y	n	n	interacts with OSMR/EGFRvIII, not with OSMR
P11912	Q8WVX3	CD79A	C4orf3	NA	n	y	y	n	n	interacts with OSMR, not with OSMR/EGFRvIII
P11686	P11912	SFTPC	CD79A	NA	n	y	y	n	n	interacts with OSMR/EGFRvIII, not with OSMR
Q3KNW5	Q9BUP3	SLC10A6	HTATIP2	NA	n	y	y	n	n	interacts with OSMR/EGFRvIII, not with OSMR
P60201	Q96JQ5	PLP1	MS4A4A	NA	n	y	y	n	n	interacts with OSMR, not with OSMR/EGFRvIII
Q16630	Q96E35	CPSF6	ZMYND19	NA	n	y	y	n	n	interacts with OSMR, not with OSMR/EGFRvIII
P48544	Q99712	KCNJ5	KCNJ15	NA	n	y	y	y	n	interacts with OSMR, not with OSMR/EGFRvIII
Q3KNW5	Q9Y5Y5	SLC10A6	PEX16	NA	n	y	y	n	n	interacts with OSMR/EGFRvIII, not with OSMR
P48051	Q9Y5Y5	KCNJ6	PEX16	NA	n	y	y	n	n	interacts with OSMR/EGFRvIII, not with OSMR
P60201	Q9BVX2	PLP1	TMEM106C	NA	n	y	y	n	n	interacts with OSMR, not with OSMR/EGFRvIII
P60201	Q3KNW5	PLP1	SLC10A6	NA	n	y	y	n	n	interacts with OSMR, not with OSMR/EGFRvIII
Q9BVX2	Q9NVV5	TMEM106C	AIG1	NA	n	y	y	n	n	interacts with OSMR, not with OSMR/EGFRvIII
P11686	Q9BVX2	SFTPC	TMEM106C	NA	n	y	y	n	n	interacts with OSMR, not with OSMR/EGFRvIII
Q3KNW5	Q8IXM6	SLC10A6	NRM	NA	n	y	y	n	n	interacts with OSMR and with OSMR/EGFRvIII
Q3KNW5	Q9UHE5	SLC10A6	NAT8	NA	n	y	y	n	n	interacts with OSMR and with OSMR/EGFRvIII
Q13021	Q3KNW5	MALL	SLC10A6	NA	n	y	y	n	n	interacts with OSMR, not with OSMR/EGFRvIII
Q13021	Q2HXU8	MALL	CLEC12B	NA	n	y	y	n	n	interacts with OSMR, not with OSMR/EGFRvIII
Q3KNW5	Q9Y3D6	SLC10A6	FIS1	NA	n	y	y	n	n	interacts with OSMR, not with OSMR/EGFRvIII
P13236	Q3KNW5	CCL4	SLC10A6	NA	n	y	y	n	n	interacts with OSMR, not with OSMR/EGFRvIII
P48051	Q9NVV5	KCNJ6	AIG1	NA	n	y	y	n	n	interacts with OSMR, not with OSMR/EGFRvIII
O43653	Q9NVV5	PSCA	AIG1	NA	n	y	y	n	n	interacts with OSMR, not with OSMR/EGFRvIII
P48051	Q9Y3D6	KCNJ6	FIS1	NA	n	y	y	n	n	interacts with OSMR, not with OSMR/EGFRvIII
Q8TBG9	Q8WVX3	SYNPR	C4orf3	NA	n	y	y	n	n	interacts with OSMR, not with OSMR/EGFRvIII
Q8IZ26	Q99697	ZNF34	PITX2	NA	n	y	y	n	n	interacts with OSMR/EGFRvIII, not with OSMR
Q99697	Q9BYR6	PITX2	KRTAP3-3	NA	n	y	y	n	n	interacts with OSMR/EGFRvIII, not with OSMR
Q5T4B2	Q9BYR6	CERCAM	KRTAP3-3	NA	n	y	y	n	n	interacts with OSMR/EGFRvIII, not with OSMR
Q9H0A0	Q9Y6X9	NAT10	MORC2	NA	n	y	y	n	n	interacts with OSMR/EGFRvIII, not with OSMR
P09544	Q99697	WNT2	PITX2	NA	n	y	y	n	n	interacts with OSMR/EGFRvIII, not with OSMR
P81605	Q9BXW9	DCD	FANCD2	NA	n	y	y	n	n	interacts with OSMR, not with OSMR/EGFRvIII
P58876	Q9BXW9	HIST1H2BD	FANCD2	NA	n	y	y	n	n	interacts with OSMR, not with OSMR/EGFRvIII
P01861	Q9BXW9	IGHG4	FANCD2	NA	n	y	y	n	n	interacts with OSMR, not with OSMR/EGFRvIII
Q9BXW9	Q9H0A0	FANCD2	NAT10	NA	n	y	y	n	y	interacts with OSMR/EGFRvIII, not with OSMR
P01602	Q9BXW9	IGKV1-5	FANCD2	NA	n	y	y	n	n	interacts with OSMR, not with OSMR/EGFRvIII
P12273	Q9BXW9	PIP	FANCD2	NA	n	y	y	n	n	interacts with OSMR, not with OSMR/EGFRvIII
Q9BXW9	Q9H0U4	FANCD2	RAB1B	NA	n	y	y	n	y	interacts with OSMR and with OSMR/EGFRvIII
P61254	Q9BXW9	RPL26	FANCD2	NA	n	y	y	n	y	interacts with OSMR, not with OSMR/EGFRvIII
P12236	Q9BXW9	SLC25A6	FANCD2	NA	n	y	y	y	n	interacts with OSMR, not with OSMR/EGFRvIII
O00299	Q9BXW9	CLIC1	FANCD2	NA	n	y	y	n	y	interacts with OSMR, not with OSMR/EGFRvIII
P02774	Q9BXW9	GC	FANCD2	NA	n	y	y	n	n	interacts with OSMR, not with OSMR/EGFRvIII
P63092	Q9BXW9	GNAS	FANCD2	NA	n	y	y	n	y	interacts with OSMR, not with OSMR/EGFRvIII
P55084	Q9BXW9	HADHB	FANCD2	NA	n	y	y	n	n	interacts with OSMR, not with OSMR/EGFRvIII
P48594	Q9BXW9	SERPINB4	FANCD2	NA	n	y	y	n	n	interacts with OSMR, not with OSMR/EGFRvIII
Q15363	Q9BXW9	TMED2	FANCD2	NA	n	y	y	n	n	interacts with OSMR, not with OSMR/EGFRvIII
P0C0S5	P58876	H2AFZ	HIST1H2BD	NA	n	y	y	y	n	interacts with OSMR/EGFRvIII, not with OSMR
P55769	Q14005	NHP2L1	IL16	NA	n	y	y	n	n	interacts with OSMR, not with OSMR/EGFRvIII
O95831	Q96T52	AIFM1	IMMP2L	NA	n	y	y	n	n	interacts with OSMR and with OSMR/EGFRvIII
Q96T52	Q9BQ95	IMMP2L	ECSIT	NA	n	y	y	n	n	interacts with OSMR/EGFRvIII, not with OSMR
Q96C36	Q96T52	PYCR2	IMMP2L	NA	n	y	y	n	n	interacts with OSMR and with OSMR/EGFRvIII
Q96T52	Q9Y375	IMMP2L	NDUFAF1	NA	n	y	y	n	n	interacts with OSMR/EGFRvIII, not with OSMR
A4D1E9	Q96T52	GTPBP10	IMMP2L	NA	n	y	y	n	n	interacts with OSMR and with OSMR/EGFRvIII
Q92552	Q96T52	MRPS27	IMMP2L	NA	n	y	y	n	n	interacts with OSMR and with OSMR/EGFRvIII
P12236	Q96GD4	SLC25A6	AURKB	NA	n	y	y	n	n	interacts with OSMR/EGFRvIII, not with OSMR
O95831	Q96GD4	AIFM1	AURKB	NA	n	y	y	n	n	interacts with OSMR/EGFRvIII, not with OSMR
Q96GD4	Q9UL15	AURKB	BAG5	NA	n	y	y	n	n	interacts with OSMR/EGFRvIII, not with OSMR
P61254	Q96GD4	RPL26	AURKB	NA	n	y	y	n	n	interacts with OSMR/EGFRvIII, not with OSMR
P0C0S5	Q96GD4	H2AFZ	AURKB	NA	n	y	y	y	n	interacts with OSMR/EGFRvIII, not with OSMR
P36873	Q96GD4	PPP1CC	AURKB	NA	n	y	y	y	n	interacts with OSMR/EGFRvIII, not with OSMR
Q96GD4	Q96QU6	AURKB	ACCS	NA	n	y	y	n	n	interacts with OSMR, not with OSMR/EGFRvIII
P51572	Q9UBQ0	BCAP31	VPS29	NA	n	y	y	n	n	interacts with OSMR, not with OSMR/EGFRvIII
P05112	P31785	IL4	IL2RG	NA	n	y	y	y	n	interacts with OSMR, not with OSMR/EGFRvIII
Q6UXL0	Q9NYY1	IL20RB	IL20	NA	n	y	y	y	n	interacts with OSMR, not with OSMR/EGFRvIII
P48051	P48544	KCNJ6	KCNJ5	NA	n	y	y	y	n	interacts with OSMR, not with OSMR/EGFRvIII
Q96C36	Q9UIM3	PYCR2	FKBPL	NA	n	y	y	n	n	interacts with OSMR/EGFRvIII, not with OSMR
O43889	Q16649	CREB3	NFIL3	NA	n	y	y	n	n	interacts with OSMR, not with OSMR/EGFRvIII
O95214	Q8IXM6	LEPROTL1	NRM	NA	n	y	y	n	n	interacts with OSMR and with OSMR/EGFRvIII
O43889	P05155	CREB3	SERPING1	NA	n	y	y	n	n	interacts with OSMR, not with OSMR/EGFRvIII
P68431	Q9HCE5	HIST1H3C	METTL14	NA	n	y	y	n	n	interacts with OSMR, not with OSMR/EGFRvIII
O43889	Q8N6G5	CREB3	CSGALNACT2	NA	n	y	y	n	n	interacts with OSMR and with OSMR/EGFRvIII
O43889	Q8N4V2	CREB3	SVOP	NA	n	y	y	n	n	interacts with OSMR/EGFRvIII, not with OSMR
O43889	Q9UHE5	CREB3	NAT8	NA	n	y	y	n	n	interacts with OSMR and with OSMR/EGFRvIII
P81605	Q8WTS6	DCD	SETD7	NA	n	y	y	n	n	interacts with OSMR and with OSMR/EGFRvIII
P17302	Q9NP61	GJA1	ARFGAP3	NA	n	y	y	n	n	interacts with OSMR, not with OSMR/EGFRvIII
Q14005	Q92876	IL16	KLK6	NA	n	y	y	n	n	interacts with OSMR/EGFRvIII, not with OSMR
P51572	Q92876	BCAP31	KLK6	NA	n	y	y	n	n	interacts with OSMR/EGFRvIII, not with OSMR
Q92876	Q9NP61	KLK6	ARFGAP3	NA	n	y	y	n	n	interacts with OSMR, not with OSMR/EGFRvIII
P49768	P68431	PSEN1	HIST1H3C	NA	n	y	y	n	n	interacts with OSMR, not with OSMR/EGFRvIII
O14494	P49768	PPAP2A	PSEN1	NA	n	y	y	n	n	interacts with OSMR/EGFRvIII, not with OSMR
Q8IU80	Q92876	TMPRSS6	KLK6	NA	n	y	y	y	n	interacts with OSMR/EGFRvIII, not with OSMR
Q9NYY1	Q9Y397	IL20	ZDHHC9	NA	n	y	y	n	n	interacts with OSMR/EGFRvIII, not with OSMR
Q14005	Q99712	IL16	KCNJ15	NA	n	y	y	y	y	interacts with OSMR, not with OSMR/EGFRvIII
O00299	Q6EEV6	CLIC1	SUMO4	NA	n	y	y	n	n	interacts with OSMR, not with OSMR/EGFRvIII
P04150	Q6EEV6	NR3C1	SUMO4	NA	n	y	y	n	n	interacts with OSMR, not with OSMR/EGFRvIII
P07585	P08254	DCN	MMP3	NA	n	y	y	n	n	interacts with OSMR/EGFRvIII, not with OSMR
P41227	P61254	NAA10	RPL26	NA	n	y	y	n	n	interacts with OSMR, not with OSMR/EGFRvIII
P33993	Q96GD4	MCM7	AURKB	NA	n	y	n	y	n	interacts with OSMR/EGFRvIII, not with OSMR
P60201	Q13491	PLP1	GPM6B	NA	n	y	n	y	n	interacts with OSMR/EGFRvIII, not with OSMR
O95831	P12236	AIFM1	SLC25A6	NA	n	y	n	y	n	interacts with OSMR/EGFRvIII, not with OSMR
P31785	P35225	IL2RG	IL13	NA	n	y	n	y	n	interacts with OSMR, not with OSMR/EGFRvIII
P49768	Q15363	PSEN1	TMED2	NA	n	y	n	y	y	interacts with OSMR, not with OSMR/EGFRvIII
P58876	P68431	HIST1H2BD	HIST1H3C	NA	n	y	n	y	n	interacts with OSMR, not with OSMR/EGFRvIII
P05112	P35225	IL4	IL13	NA	n	y	n	y	n	interacts with OSMR, not with OSMR/EGFRvIII
P55008	Q96JQ5	AIF1	MS4A4A	NA	n	y	n	y	n	interacts with OSMR, not with OSMR/EGFRvIII
Q14314	Q53QZ3	FGL2	ARHGAP15	NA	n	y	n	y	n	interacts with OSMR, not with OSMR/EGFRvIII
P05155	P07585	SERPING1	DCN	NA	n	y	n	y	n	interacts with OSMR and with OSMR/EGFRvIII
P55008	Q14314	AIF1	FGL2	NA	n	y	n	y	n	interacts with OSMR, not with OSMR/EGFRvIII
P07585	P16671	DCN	CD36	NA	n	y	n	y	n	interacts with OSMR, not with OSMR/EGFRvIII
P0C0S5	P33993	H2AFZ	MCM7	NA	n	y	n	y	n	interacts with OSMR, not with OSMR/EGFRvIII
P60201	Q9H313	PLP1	TTYH1	NA	n	y	n	y	n	interacts with OSMR, not with OSMR/EGFRvIII
O95831	Q9UL15	AIFM1	BAG5	NA	n	y	n	y	n	interacts with OSMR/EGFRvIII, not with OSMR
P12236	Q9UL15	SLC25A6	BAG5	NA	n	y	n	y	n	interacts with OSMR/EGFRvIII, not with OSMR
P04150	Q16621	NR3C1	NFE2	NA	n	y	n	y	n	interacts with OSMR/EGFRvIII, not with OSMR
P36873	P49458	PPP1CC	SRP9	NA	n	y	n	y	n	interacts with OSMR, not with OSMR/EGFRvIII
P04150	Q92844	NR3C1	TANK	NA	n	y	n	y	n	interacts with OSMR and with OSMR/EGFRvIII
P60201	Q92876	PLP1	KLK6	NA	n	y	n	y	n	interacts with OSMR/EGFRvIII, not with OSMR
P55084	Q9UL15	HADHB	BAG5	NA	n	y	n	y	n	interacts with OSMR/EGFRvIII, not with OSMR
P05014	P56856	IFNA4	CLDN18	NA	n	y	n	y	n	interacts with OSMR, not with OSMR/EGFRvIII
P04150	Q99697	NR3C1	PITX2	NA	n	y	n	y	n	interacts with OSMR/EGFRvIII, not with OSMR
P04150	P53779	NR3C1	MAPK10	NA	n	y	n	y	n	interacts with OSMR/EGFRvIII, not with OSMR
O95831	P51572	AIFM1	BCAP31	NA	n	y	n	y	n	interacts with OSMR and with OSMR/EGFRvIII
O95831	P55084	AIFM1	HADHB	NA	n	y	n	y	n	interacts with OSMR, not with OSMR/EGFRvIII
P53779	Q16621	MAPK10	NFE2	NA	n	y	n	y	n	interacts with OSMR/EGFRvIII, not with OSMR
O95831	P36873	AIFM1	PPP1CC	NA	n	y	n	y	n	interacts with OSMR, not with OSMR/EGFRvIII
P12236	P36873	SLC25A6	PPP1CC	NA	n	y	n	y	n	interacts with OSMR, not with OSMR/EGFRvIII
P55008	Q53QZ3	AIF1	ARHGAP15	NA	n	y	n	y	n	interacts with OSMR, not with OSMR/EGFRvIII
Q6UWZ7	Q9BXW9	FAM175A	FANCD2	NA	n	y	n	y	n	interacts with OSMR, not with OSMR/EGFRvIII
O00299	P05155	CLIC1	SERPING1	NA	n	y	n	y	n	interacts with OSMR, not with OSMR/EGFRvIII
P53779	P60201	MAPK10	PLP1	NA	n	y	n	y	n	interacts with OSMR, not with OSMR/EGFRvIII
Q14314	Q96JQ5	FGL2	MS4A4A	NA	n	y	n	y	n	interacts with OSMR, not with OSMR/EGFRvIII
Q14314	Q9BXN2	FGL2	CLEC7A	NA	n	y	n	y	n	interacts with OSMR, not with OSMR/EGFRvIII
O43889	P13236	CREB3	CCL4	NA	n	y	n	y	n	interacts with OSMR, not with OSMR/EGFRvIII
P0C0S5	P36873	H2AFZ	PPP1CC	NA	n	y	n	y	n	interacts with OSMR, not with OSMR/EGFRvIII
P04150	P36873	NR3C1	PPP1CC	NA	n	y	n	y	n	interacts with OSMR, not with OSMR/EGFRvIII
P04150	P21580	NR3C1	TNFAIP3	NA	n	y	n	y	n	interacts with OSMR, not with OSMR/EGFRvIII
P0C0S5	P49458	H2AFZ	SRP9	NA	n	y	n	y	n	interacts with OSMR, not with OSMR/EGFRvIII
O95831	P04150	AIFM1	NR3C1	NA	n	y	n	y	n	interacts with OSMR/EGFRvIII, not with OSMR
O75436	P49458	VPS26A	SRP9	NA	n	y	n	y	n	interacts with OSMR, not with OSMR/EGFRvIII
P48051	Q99712	KCNJ6	KCNJ15	NA	n	y	n	y	n	interacts with OSMR, not with OSMR/EGFRvIII
P12236	P21580	SLC25A6	TNFAIP3	NA	n	y	n	y	n	interacts with OSMR, not with OSMR/EGFRvIII
P55197	Q9C0I3	MLLT10	FAM190A	NA	n	y	n	y	n	interacts with OSMR/EGFRvIII, not with OSMR
P03973	Q16630	SLPI	CPSF6	NA	n	y	n	y	n	interacts with OSMR/EGFRvIII, not with OSMR
P53779	Q9BZQ4	MAPK10	NMNAT2	NA	n	y	n	y	n	interacts with OSMR, not with OSMR/EGFRvIII
Q13491	Q9H313	GPM6B	TTYH1	NA	n	y	n	y	n	interacts with OSMR, not with OSMR/EGFRvIII
O75830	Q15011	SERPINI2	HERPUD1	NA	n	y	n	y	n	interacts with OSMR, not with OSMR/EGFRvIII
P04150	P11912	NR3C1	CD79A	NA	n	y	n	y	n	interacts with OSMR/EGFRvIII, not with OSMR
P53779	Q99697	MAPK10	PITX2	NA	n	y	n	y	n	interacts with OSMR/EGFRvIII, not with OSMR
P36873	Q9BXW9	PPP1CC	FANCD2	NA	n	y	n	y	n	interacts with OSMR, not with OSMR/EGFRvIII
P12236	P55084	SLC25A6	HADHB	NA	n	y	n	y	n	interacts with OSMR, not with OSMR/EGFRvIII
P04150	Q9NZD8	NR3C1	SPG21	NA	n	y	n	y	n	interacts with OSMR, not with OSMR/EGFRvIII
P0C0S5	Q9BZD4	H2AFZ	NUF2	NA	n	y	n	y	n	interacts with OSMR, not with OSMR/EGFRvIII
Q6UWZ7	Q9GZX5	FAM175A	ZNF350	NA	n	y	n	y	n	interacts with OSMR/EGFRvIII, not with OSMR
Q9H0U4	Q9P289	RAB1B	MST4	NA	n	y	n	y	n	interacts with OSMR, not with OSMR/EGFRvIII
Q15363	Q9P289	TMED2	MST4	NA	n	y	n	y	n	interacts with OSMR, not with OSMR/EGFRvIII
P33993	P36873	MCM7	PPP1CC	NA	n	y	n	y	n	interacts with OSMR, not with OSMR/EGFRvIII
P04150	Q14005	NR3C1	IL16	NA	n	y	n	y	n	interacts with OSMR, not with OSMR/EGFRvIII
Q14005	Q9NZD8	IL16	SPG21	NA	n	y	n	y	n	interacts with OSMR, not with OSMR/EGFRvIII
P04150	Q8WTS6	NR3C1	SETD7	NA	n	y	n	y	n	interacts with OSMR and with OSMR/EGFRvIII
Q6UWB1	Q6UXL0	IL27RA	IL20RB	NA	n	y	n	y	n	interacts with OSMR, not with OSMR/EGFRvIII
O14807	Q9NP90	MRAS	RAB9B	NA	n	y	n	y	n	interacts with OSMR, not with OSMR/EGFRvIII
P31751	Q7RTN6	AKT2	STRADA	NA	n	y	n	y	n	interacts with OSMR/EGFRvIII, not with OSMR
P07108	Q9BR61	DBI	ACBD6	NA	n	y	n	y	n	interacts with OSMR/EGFRvIII, not with OSMR
P00750	Q8IU80	PLAT	TMPRSS6	NA	n	y	n	y	n	interacts with OSMR and with OSMR/EGFRvIII
P05112	Q6UWB1	IL4	IL27RA	NA	n	y	n	y	n	interacts with OSMR, not with OSMR/EGFRvIII
P35225	Q6UWB1	IL13	IL27RA	NA	n	y	n	y	n	interacts with OSMR, not with OSMR/EGFRvIII
P01588	Q9NYY1	EPO	IL20	NA	n	y	n	y	n	interacts with OSMR, not with OSMR/EGFRvIII
Q96GD4	Q9P289	AURKB	MST4	NA	n	y	n	y	n	interacts with OSMR, not with OSMR/EGFRvIII
Q9H0U4	Q9NP90	RAB1B	RAB9B	NA	n	y	n	y	n	interacts with OSMR, not with OSMR/EGFRvIII
Q8IU80	Q9UL52	TMPRSS6	TMPRSS11E	NA	n	y	n	y	n	interacts with OSMR, not with OSMR/EGFRvIII
Q15819	Q6EEV6	UBE2V2	SUMO4	NA	n	y	n	y	n	interacts with OSMR, not with OSMR/EGFRvIII
P21757	Q8WY64	MSR1	MYLIP	NA	n	y	n	y	n	interacts with OSMR, not with OSMR/EGFRvIII
P15692	Q6UWB1	VEGFA	IL27RA	NA	n	y	n	y	n	interacts with OSMR, not with OSMR/EGFRvIII
P05112	Q9NYY1	IL4	IL20	NA	n	y	n	y	n	interacts with OSMR, not with OSMR/EGFRvIII
Q9NP90	Q9UBK7	RAB9B	RABL2A	NA	n	y	n	y	n	interacts with OSMR/EGFRvIII, not with OSMR
O14807	Q9H0U4	MRAS	RAB1B	NA	n	y	n	y	n	interacts with OSMR and with OSMR/EGFRvIII
P05155	P50452	SERPING1	SERPINB8	NA	n	y	n	y	n	interacts with OSMR, not with OSMR/EGFRvIII
O14807	Q9H628	MRAS	RERGL	NA	n	y	n	y	n	interacts with OSMR, not with OSMR/EGFRvIII
Q9NP90	Q9UNT1	RAB9B	RABL2B	NA	n	y	n	y	n	interacts with OSMR/EGFRvIII, not with OSMR
P00750	Q92876	PLAT	KLK6	NA	n	y	n	y	n	interacts with OSMR/EGFRvIII, not with OSMR
O14807	Q9UBK7	MRAS	RABL2A	NA	n	y	n	y	n	interacts with OSMR/EGFRvIII, not with OSMR
P01588	P05112	EPO	IL4	NA	n	y	n	y	n	interacts with OSMR, not with OSMR/EGFRvIII
P31785	Q6UWB1	IL2RG	IL27RA	NA	n	y	n	y	n	interacts with OSMR, not with OSMR/EGFRvIII
P00750	P15692	PLAT	VEGFA	NA	n	y	n	y	n	interacts with OSMR, not with OSMR/EGFRvIII
O14807	Q9UNT1	MRAS	RABL2B	NA	n	y	n	y	n	interacts with OSMR/EGFRvIII, not with OSMR
Q8NDX1	Q9UBK7	PSD4	RABL2A	NA	n	y	n	y	n	interacts with OSMR/EGFRvIII, not with OSMR
Q8NDX1	Q9UNT1	PSD4	RABL2B	NA	n	y	n	y	n	interacts with OSMR/EGFRvIII, not with OSMR
P53779	Q96NX5	MAPK10	CAMK1G	NA	n	y	n	y	n	interacts with OSMR/EGFRvIII, not with OSMR
Q15819	Q8WY64	UBE2V2	MYLIP	NA	n	y	n	y	n	interacts with OSMR, not with OSMR/EGFRvIII
P31751	Q86YM7	AKT2	HOMER1	NA	n	y	n	y	n	interacts with OSMR, not with OSMR/EGFRvIII
P05155	Q92876	SERPING1	KLK6	NA	n	y	n	y	n	interacts with OSMR/EGFRvIII, not with OSMR
Q15011	Q15819	HERPUD1	UBE2V2	NA	n	y	n	y	n	interacts with OSMR, not with OSMR/EGFRvIII
Q7RTN6	Q9P289	STRADA	MST4	NA	n	y	n	y	n	interacts with OSMR, not with OSMR/EGFRvIII
Q53QZ3	Q7Z6B7	ARHGAP15	SRGAP1	NA	n	y	n	y	y	interacts with OSMR/EGFRvIII, not with OSMR
Q92876	Q9UL52	KLK6	TMPRSS11E	NA	n	y	n	y	n	interacts with OSMR, not with OSMR/EGFRvIII
P03973	Q9UL52	SLPI	TMPRSS11E	NA	n	y	n	y	n	interacts with OSMR, not with OSMR/EGFRvIII
P05162	Q9UHV8	LGALS2	LGALS13	NA	n	y	n	y	n	interacts with OSMR, not with OSMR/EGFRvIII
P31751	Q8WY64	AKT2	MYLIP	NA	n	y	n	y	n	interacts with OSMR, not with OSMR/EGFRvIII
Q2HXU8	Q9UJ71	CLEC12B	CD207	NA	n	y	n	y	n	interacts with OSMR/EGFRvIII, not with OSMR
Q9H628	Q9NP90	RERGL	RAB9B	NA	n	y	n	y	n	interacts with OSMR, not with OSMR/EGFRvIII
Q9BXN2	Q9UJ71	CLEC7A	CD207	NA	n	y	n	y	n	interacts with OSMR/EGFRvIII, not with OSMR
O95361	Q6UWB1	TRIM16	IL27RA	NA	n	y	n	y	n	interacts with OSMR, not with OSMR/EGFRvIII
P31751	Q9HAZ1	AKT2	CLK4	NA	n	y	n	y	n	interacts with OSMR, not with OSMR/EGFRvIII
P15692	Q04771	VEGFA	ACVR1	NA	n	y	n	y	n	interacts with OSMR, not with OSMR/EGFRvIII
Q9H0U4	Q9UBK7	RAB1B	RABL2A	NA	n	y	n	y	n	interacts with OSMR/EGFRvIII, not with OSMR
Q9H0U4	Q9UNT1	RAB1B	RABL2B	NA	n	y	n	y	n	interacts with OSMR/EGFRvIII, not with OSMR
P00750	Q9UL52	PLAT	TMPRSS11E	NA	n	y	n	y	n	interacts with OSMR, not with OSMR/EGFRvIII
Q9UJ71	Q9Y6Z7	CD207	COLEC10	NA	n	y	n	y	n	interacts with OSMR, not with OSMR/EGFRvIII
Q6EEV6	Q7Z6B7	SUMO4	SRGAP1	NA	n	y	n	y	n	interacts with OSMR/EGFRvIII, not with OSMR
Q04771	Q6UXL0	ACVR1	IL20RB	NA	n	y	n	y	n	interacts with OSMR, not with OSMR/EGFRvIII
P05155	P48594	SERPING1	SERPINB4	NA	n	y	n	y	n	interacts with OSMR, not with OSMR/EGFRvIII
Q96GD4	Q9HAZ1	AURKB	CLK4	NA	n	y	n	y	n	interacts with OSMR, not with OSMR/EGFRvIII
Q92478	Q9UJ71	CLEC2B	CD207	NA	n	y	n	y	n	interacts with OSMR/EGFRvIII, not with OSMR
Q2HXU8	Q9BXN2	CLEC12B	CLEC7A	NA	n	y	n	y	n	interacts with OSMR, not with OSMR/EGFRvIII
P43630	Q6UWB1	KIR3DL2	IL27RA	NA	n	y	n	y	n	interacts with OSMR, not with OSMR/EGFRvIII
P15692	Q14005	VEGFA	IL16	NA	n	y	n	y	n	interacts with OSMR, not with OSMR/EGFRvIII
P31751	Q96GD4	AKT2	AURKB	NA	n	y	n	y	n	interacts with OSMR/EGFRvIII, not with OSMR
P01588	Q6UWB1	EPO	IL27RA	NA	n	y	n	y	n	interacts with OSMR, not with OSMR/EGFRvIII
Q92478	Q9BXN2	CLEC2B	CLEC7A	NA	n	y	n	y	n	interacts with OSMR, not with OSMR/EGFRvIII
Q9HAZ1	Q9P289	CLK4	MST4	NA	n	y	n	y	n	interacts with OSMR, not with OSMR/EGFRvIII
P31751	P53779	AKT2	MAPK10	NA	n	y	n	y	n	interacts with OSMR/EGFRvIII, not with OSMR
Q9UBK7	Q9UNT1	RABL2A	RABL2B	NA	n	y	n	y	n	interacts with OSMR/EGFRvIII, not with OSMR
P63092	Q9NP90	GNAS	RAB9B	NA	n	y	n	y	n	interacts with OSMR, not with OSMR/EGFRvIII
O60291	Q92876	MGRN1	KLK6	NA	n	y	n	y	n	interacts with OSMR/EGFRvIII, not with OSMR
P05112	P11912	IL4	CD79A	NA	n	y	n	y	n	interacts with OSMR/EGFRvIII, not with OSMR
O14807	Q8NDX1	MRAS	PSD4	NA	n	y	n	y	n	interacts with OSMR/EGFRvIII, not with OSMR
O14921	P63092	RGS13	GNAS	NA	n	y	n	y	n	interacts with OSMR/EGFRvIII, not with OSMR
P31751	Q8IU80	AKT2	TMPRSS6	NA	n	y	n	y	n	interacts with OSMR and with OSMR/EGFRvIII
Q14005	Q8IU80	IL16	TMPRSS6	NA	n	y	n	y	n	interacts with OSMR and with OSMR/EGFRvIII
Q15011	Q8WY64	HERPUD1	MYLIP	NA	n	y	n	y	n	interacts with OSMR, not with OSMR/EGFRvIII
Q8NDX1	Q9NP90	PSD4	RAB9B	NA	n	y	n	y	n	interacts with OSMR, not with OSMR/EGFRvIII
O95361	Q9NYY1	TRIM16	IL20	NA	n	y	n	y	n	interacts with OSMR, not with OSMR/EGFRvIII
Q86YM7	Q92876	HOMER1	KLK6	NA	n	y	n	y	n	interacts with OSMR/EGFRvIII, not with OSMR
Q15011	Q6EEV6	HERPUD1	SUMO4	NA	n	y	n	y	n	interacts with OSMR, not with OSMR/EGFRvIII
O14807	Q86YM7	MRAS	HOMER1	NA	n	y	n	y	n	interacts with OSMR, not with OSMR/EGFRvIII
O60291	Q8WY64	MGRN1	MYLIP	NA	n	y	n	y	n	interacts with OSMR, not with OSMR/EGFRvIII
P03973	Q92876	SLPI	KLK6	NA	n	y	n	y	n	interacts with OSMR/EGFRvIII, not with OSMR
O75830	P48594	SERPINI2	SERPINB4	NA	n	y	n	y	n	interacts with OSMR, not with OSMR/EGFRvIII
P05155	Q8IU80	SERPING1	TMPRSS6	NA	n	y	n	y	n	interacts with OSMR and with OSMR/EGFRvIII
Q14005	Q6UXL0	IL16	IL20RB	NA	n	y	n	y	n	interacts with OSMR, not with OSMR/EGFRvIII
P31751	Q14005	AKT2	IL16	NA	n	y	n	y	n	interacts with OSMR, not with OSMR/EGFRvIII
P31751	Q9P289	AKT2	MST4	NA	n	y	n	y	n	interacts with OSMR, not with OSMR/EGFRvIII
P16671	Q8WY64	CD36	MYLIP	NA	n	y	n	y	n	interacts with OSMR, not with OSMR/EGFRvIII
Q8NG76	Q8NH93	OR2T33	OR1L3	NA	n	y	n	y	n	interacts with OSMR, not with OSMR/EGFRvIII
P01861	Q9UDY6	IGHG4	TRIM10	NA	n	y	n	y	n	interacts with OSMR, not with OSMR/EGFRvIII
P01602	P01861	IGKV1-5	IGHG4	NA	n	y	n	y	n	interacts with OSMR/EGFRvIII, not with OSMR
P00750	P31751	PLAT	AKT2	NA	n	y	n	y	n	interacts with OSMR/EGFRvIII, not with OSMR
P05014	Q9NYY1	IFNA4	IL20	NA	n	y	n	y	n	interacts with OSMR, not with OSMR/EGFRvIII
P31751	Q15011	AKT2	HERPUD1	NA	n	y	n	y	n	interacts with OSMR, not with OSMR/EGFRvIII
P31751	P63092	AKT2	GNAS	NA	n	y	n	y	n	interacts with OSMR/EGFRvIII, not with OSMR
P25021	P28566	HRH2	HTR1E	NA	n	y	n	y	n	interacts with OSMR, not with OSMR/EGFRvIII
Q15011	Q7Z6B7	HERPUD1	SRGAP1	NA	n	y	n	y	n	interacts with OSMR/EGFRvIII, not with OSMR
O95361	P15692	TRIM16	VEGFA	NA	n	y	n	y	n	interacts with OSMR, not with OSMR/EGFRvIII
O75830	P50452	SERPINI2	SERPINB8	NA	n	y	n	y	n	interacts with OSMR, not with OSMR/EGFRvIII
P00750	P03973	PLAT	SLPI	NA	n	y	n	y	n	interacts with OSMR, not with OSMR/EGFRvIII
P00750	P29274	PLAT	ADORA2A	NA	n	y	n	y	n	interacts with OSMR/EGFRvIII, not with OSMR
Q2HXU8	Q92478	CLEC12B	CLEC2B	NA	n	y	n	y	n	interacts with OSMR and with OSMR/EGFRvIII
P15692	P29274	VEGFA	ADORA2A	NA	n	y	n	y	n	interacts with OSMR/EGFRvIII, not with OSMR
P07108	P48651	DBI	PTDSS1	NA	n	y	n	y	n	interacts with OSMR and with OSMR/EGFRvIII
P36873	P78417	PPP1CC	GSTO1	NA	n	y	n	y	n	interacts with OSMR/EGFRvIII, not with OSMR
P43304	Q9UII2	GPD2	ATPIF1	NA	n	y	n	y	n	interacts with OSMR, not with OSMR/EGFRvIII
P12236	P51572	SLC25A6	BCAP31	NA	n	y	n	y	n	interacts with OSMR and with OSMR/EGFRvIII
P48651	P51572	PTDSS1	BCAP31	NA	n	y	n	y	n	interacts with OSMR and with OSMR/EGFRvIII
P41227	P49458	NAA10	SRP9	NA	n	y	n	y	n	interacts with OSMR, not with OSMR/EGFRvIII
P07108	P49458	DBI	SRP9	NA	n	y	n	y	n	interacts with OSMR, not with OSMR/EGFRvIII
O75436	Q08AM6	VPS26A	VAC14	NA	n	y	n	y	n	interacts with OSMR/EGFRvIII, not with OSMR
P07108	P78417	DBI	GSTO1	NA	n	y	n	y	n	interacts with OSMR/EGFRvIII, not with OSMR
P55769	Q9NWZ8	NHP2L1	GEMIN8	NA	n	y	n	y	n	interacts with OSMR/EGFRvIII, not with OSMR
P55769	Q9BUP3	NHP2L1	HTATIP2	NA	n	y	n	y	n	interacts with OSMR/EGFRvIII, not with OSMR
P07108	P36873	DBI	PPP1CC	NA	n	y	n	y	n	interacts with OSMR, not with OSMR/EGFRvIII
Q9HAY6	Q9Y5Y5	BCMO1	PEX16	NA	n	y	n	y	n	interacts with OSMR/EGFRvIII, not with OSMR
O95831	P55008	AIFM1	AIF1	NA	n	y	n	y	n	interacts with OSMR, not with OSMR/EGFRvIII
Q15819	Q9UBX0	UBE2V2	HESX1	NA	n	y	n	y	n	interacts with OSMR/EGFRvIII, not with OSMR
Q8NDX1	Q9NWU1	PSD4	OXSM	NA	n	y	n	y	n	interacts with OSMR/EGFRvIII, not with OSMR
P41227	P55769	NAA10	NHP2L1	NA	n	y	n	y	n	interacts with OSMR, not with OSMR/EGFRvIII
P48651	P78417	PTDSS1	GSTO1	NA	n	y	n	y	n	interacts with OSMR/EGFRvIII, not with OSMR
Q8NDX1	Q9UBX0	PSD4	HESX1	NA	n	y	n	y	n	interacts with OSMR/EGFRvIII, not with OSMR
P07108	Q9UBY8	DBI	CLN8	NA	n	y	n	y	n	interacts with OSMR, not with OSMR/EGFRvIII
Q08AM6	Q9UBQ0	VAC14	VPS29	NA	n	y	n	y	n	interacts with OSMR, not with OSMR/EGFRvIII
P12236	P48651	SLC25A6	PTDSS1	NA	n	y	n	y	n	interacts with OSMR and with OSMR/EGFRvIII
P27816	Q9BZD4	MAP4	NUF2	NA	n	y	n	y	n	interacts with OSMR, not with OSMR/EGFRvIII
Q15819	Q16621	UBE2V2	NFE2	NA	n	y	n	y	n	interacts with OSMR/EGFRvIII, not with OSMR
Q9H0U4	Q9Y284	RAB1B	C19orf56	NA	n	y	n	y	n	interacts with OSMR, not with OSMR/EGFRvIII
Q16621	Q6P1K2	NFE2	PMF1	NA	n	y	n	y	n	interacts with OSMR/EGFRvIII, not with OSMR
Q16621	Q9UBX0	NFE2	HESX1	NA	n	y	n	y	n	interacts with OSMR/EGFRvIII, not with OSMR
P36873	P48651	PPP1CC	PTDSS1	NA	n	y	n	y	n	interacts with OSMR and with OSMR/EGFRvIII
Q07817	Q9UL15	BCL2L1	BAG5	NA	n	y	n	y	n	interacts with OSMR/EGFRvIII, not with OSMR
P11216	P36873	PYGB	PPP1CC	NA	n	y	n	y	n	interacts with OSMR, not with OSMR/EGFRvIII
O14734	P43155	ACOT8	CRAT	NA	n	y	n	y	y	interacts with OSMR/EGFRvIII, not with OSMR
P48051	Q9ULS6	KCNJ6	KCNS2	NA	n	y	n	y	n	interacts with OSMR/EGFRvIII, not with OSMR
Q99712	Q9ULS6	KCNJ15	KCNS2	NA	n	y	n	y	n	interacts with OSMR/EGFRvIII, not with OSMR
P48544	Q9ULS6	KCNJ5	KCNS2	NA	n	y	n	y	n	interacts with OSMR/EGFRvIII, not with OSMR
O95831	Q9BXW9	AIFM1	FANCD2	NA	n	y	n	n	y	interacts with OSMR, not with OSMR/EGFRvIII
Q9BXW9	Q9UL15	FANCD2	BAG5	NA	n	y	n	n	y	interacts with OSMR/EGFRvIII, not with OSMR
Q68CQ7	Q9BXW9	GLT8D1	FANCD2	NA	n	y	n	n	y	interacts with OSMR, not with OSMR/EGFRvIII
Q8NF37	Q9BXW9	LPCAT1	FANCD2	NA	n	y	n	n	y	interacts with OSMR, not with OSMR/EGFRvIII
Q9BXW9	Q9P289	FANCD2	MST4	NA	n	y	n	n	y	interacts with OSMR, not with OSMR/EGFRvIII
P11216	Q9BXW9	PYGB	FANCD2	NA	n	y	n	n	y	interacts with OSMR, not with OSMR/EGFRvIII
Q96AQ6	Q9BXW9	PBXIP1	FANCD2	NA	n	y	n	n	y	interacts with OSMR, not with OSMR/EGFRvIII
O43909	Q9BXW9	EXTL3	FANCD2	NA	n	y	n	n	y	interacts with OSMR, not with OSMR/EGFRvIII
Q92643	Q9BXW9	PIGK	FANCD2	NA	n	y	n	n	y	interacts with OSMR, not with OSMR/EGFRvIII
P23381	Q9BXW9	WARS	FANCD2	NA	n	y	n	n	y	interacts with OSMR, not with OSMR/EGFRvIII
Q6PIW4	Q9BXW9	FIGNL1	FANCD2	NA	n	y	n	n	y	interacts with OSMR, not with OSMR/EGFRvIII
P11912	Q9BXW9	CD79A	FANCD2	NA	n	y	n	n	y	interacts with OSMR, not with OSMR/EGFRvIII
P43304	Q9BXW9	GPD2	FANCD2	NA	n	y	n	n	y	interacts with OSMR, not with OSMR/EGFRvIII
A8MVS5	Q9BXW9	C19orf38	FANCD2	NA	n	y	n	n	y	interacts with OSMR, not with OSMR/EGFRvIII
Q9BRX8	Q9BXW9	C10orf58	FANCD2	NA	n	y	n	n	y	interacts with OSMR, not with OSMR/EGFRvIII
P55769	Q9BXW9	NHP2L1	FANCD2	NA	n	y	n	n	y	interacts with OSMR, not with OSMR/EGFRvIII
Q92552	Q9BXW9	MRPS27	FANCD2	NA	n	y	n	n	y	interacts with OSMR, not with OSMR/EGFRvIII
O60493	O75436	SNX3	VPS26A	NA	n	y	n	n	y	interacts with OSMR, not with OSMR/EGFRvIII
P63092	Q53QZ3	GNAS	ARHGAP15	NA	n	y	n	n	y	interacts with OSMR, not with OSMR/EGFRvIII
P43155	P55084	CRAT	HADHB	NA	n	y	n	n	y	interacts with OSMR, not with OSMR/EGFRvIII
P63092	Q7Z6B7	GNAS	SRGAP1	NA	n	y	n	n	y	interacts with OSMR/EGFRvIII, not with OSMR
O43422	Q96GD4	PRKRIR	AURKB	NA	n	y	n	n	y	interacts with OSMR/EGFRvIII, not with OSMR
P17302	Q9UBQ0	GJA1	VPS29	NA	n	y	n	n	y	interacts with OSMR, not with OSMR/EGFRvIII
P07585	P17302	DCN	GJA1	NA	n	y	n	n	y	interacts with OSMR, not with OSMR/EGFRvIII
P17302	Q9UPQ0	GJA1	LIMCH1	NA	n	y	n	n	y	interacts with OSMR, not with OSMR/EGFRvIII
P17302	Q8IXM6	GJA1	NRM	NA	n	y	n	n	y	interacts with OSMR and with OSMR/EGFRvIII
P11216	P17302	PYGB	GJA1	NA	n	y	n	n	y	interacts with OSMR, not with OSMR/EGFRvIII
O14958	P17302	CASQ2	GJA1	NA	n	y	n	n	y	interacts with OSMR, not with OSMR/EGFRvIII
P17302	P43155	GJA1	CRAT	NA	n	y	n	n	y	interacts with OSMR/EGFRvIII, not with OSMR
O95831	P17302	AIFM1	GJA1	NA	n	y	n	n	y	interacts with OSMR, not with OSMR/EGFRvIII
P35225	Q16649	IL13	NFIL3	NA	n	y	n	n	y	interacts with OSMR, not with OSMR/EGFRvIII
